# Supplementary material for: Concomitant Hepatorenal Dysfunction and Malnutrition in Valvular Heart Surgery: Long‐Term Prognostic Implications for Death and Heart Failure
Source: PubMed Central journal article supplement (PMC9238555; doi:10.1161/jaha.121.024060), 2022-05-16
Supplement: JAH3-11-e024060-s001.pdf [file JAH3-11-e024060-s001.pdf]

## **SUPPLEMENTAL MATERIAL**

Table S1. Baseline characteristics of patients included and excluded from the study

| Characteristics                                               | Patients included in the study<br>(n=909) | Patients excluded from the study<br>(n=171) | P value |
|---------------------------------------------------------------|-------------------------------------------|---------------------------------------------|---------|
| <b>Demographic and anthropometric characteristics</b>         |                                           |                                             |         |
| Age, years                                                    | 63 (57-69)                                | 64 (50-72)                                  | 0.647   |
| Male                                                          | 431 (47.4)                                | 91 (53.2)                                   | 0.320   |
| Height, cm                                                    | 159 (153-166)                             | 164 (157-170)                               | 0.002   |
| Weight, kg                                                    | 58 (50-67)                                | 61 (52-67)                                  | 0.717   |
| Body mass index, kg/m <sup>2</sup>                            | 23.0 (20.6-25.6)                          | 22.6 (20.3-24.7)                            | 0.103   |
| NYHA Class III/IV                                             | 69 (7.6)                                  | 10 (5.8)                                    | 0.139   |
| <b>Cardiovascular risk factors and cardiovascular disease</b> |                                           |                                             |         |
| Hypertension                                                  | 290 (31.9)                                | 53 (31.0)                                   | 0.973   |
| Diabetes Mellitus                                             | 165 (18.2)                                | 24 (14.0)                                   | 0.194   |
| Dyslipidemia                                                  | 231 (25.4)                                | 30 (17.5)                                   | 0.013   |
| Smoking                                                       | 178 (19.6)                                | 37 (21.6)                                   | 0.808   |
| Prior myocardial infarction                                   | 37 (4.1)                                  | 5 (2.9)                                     | 0.404   |
| Prior stroke                                                  | 82 (9.1)                                  | 15 (8.8)                                    | 0.867   |
| Heart failure                                                 | 393 (43.2)                                | 58 (33.9)                                   | 0.032   |
| Atrial fibrillation                                           | 487 (53.6)                                | 71 (41.5)                                   | 0.011   |
| <b>Comorbidities</b>                                          |                                           |                                             |         |

|                                                               |                  |                  |        |
|---------------------------------------------------------------|------------------|------------------|--------|
| Chronic obstructive pulmonary disease                         | 52 (5.7)         | 7 (4.1)          | 0.479  |
| Cancer                                                        | 52 (5.7)         | 16 (9.4)         | 0.020  |
| <b>Laboratory examination</b>                                 |                  |                  |        |
| Hemoglobin, g/dL                                              | 12.9 (11.6-14.0) | 12.9 (11.3-14.1) | 0.955  |
| White cell count, x 10 <sup>9</sup> /L                        | 5.9 (4.9-7.0)    | 8.3 (5.7-10.6)   | <0.001 |
| Platelet count, x 10 <sup>9</sup> /L                          | 189 (157-227)    | 284 (191-356)    | <0.001 |
| Creatinine, mg/dL                                             | 0.92 (0.78-1.14) | –                | –      |
| eGFR, ml/min/1.73m <sup>2</sup>                               | 75.9 (60.9-90.1) | –                | –      |
| AST, U/L                                                      | 27 (22-35)       | –                | –      |
| ALT, U/L                                                      | 21 (16-29)       | –                | –      |
| ALP, U/L                                                      | 71 (58-90)       | –                | –      |
| Total bilirubin, mg/dL                                        | 0.53 (0.75-1.14) | –                | –      |
| Total cholesterol, mg/dL                                      | 159 (134-188)    | –                | –      |
| Albumin, g/dL                                                 | 4.2 (4.0-4.4)    | –                | –      |
| <b>Valvular heart disease and echocardiographic variables</b> |                  |                  |        |
| MS ≥ moderate                                                 | 229 (25.2)       | 14 (8.2)         | <0.001 |
| MR ≥ moderate                                                 | 411 (45.2)       | 112 (62.6)       | 0.071  |
| AS ≥ moderate                                                 | 322 (35.4)       | 33 (19.3)        | <0.001 |
| AR ≥ moderate                                                 | 231 (25.4)       | 39 (39.2)        | 0.054  |
| TR ≥ moderate                                                 | 365 (40.2)       | 94 (54.9)        | 0.219  |

|                                                   |                  |                  |        |
|---------------------------------------------------|------------------|------------------|--------|
| Chronic Rheumatic Heart Disease                   | 259 (28.5)       | 35 (20.5)        | 0.052  |
| LVEF, %                                           | 60 (55-60)       | 60 (55-60)       | 0.548  |
| PASP, mmHg                                        | 40 (35-50)       | 45 (30-75)       | 0.019  |
| <b>Medications</b>                                |                  |                  |        |
| ACEI                                              | 286 (31.5)       | 37 (21.6)        | 0.009  |
| ARB                                               | 142 (15.6)       | 24 (14.0)        | 0.679  |
| Aldactone                                         | 117 (12.9)       | 23 (13.5)        | 0.977  |
| Beta blockers                                     | 374 (41.1)       | 63 (36.8)        | 0.499  |
| Calcium channel blockers                          | 185 (20.4)       | 27 (15.8)        | 0.161  |
| Digoxin                                           | 269 (29.6)       | 37 (21.6)        | 0.155  |
| Statin                                            | 373 (41.0)       | 48 (28.1)        | <0.001 |
| Warfarin                                          | 417 (45.9)       | 58 (33.9)        | 0.005  |
| <b>Cardiac surgery risk-stratification models</b> |                  |                  |        |
| EuroScore II                                      | 2.42 (1.33-4.50) | 1.68 (1.04-2.78) | <0.001 |
| STS Score                                         | 1.49 (0.87-2.76) | 0.91 (0.43-1.81) | <0.001 |
| <b>Valvular surgery details</b>                   |                  |                  |        |
| Aortic valve replacement                          | 460 (50.7)       | 66 (38.6)        | 0.209  |
| Mitral valve procedure                            | 554 (61.0)       | 120 (70.2)       | 0.398  |
| Mitral valve replacement                          | 295 (32.5)       | 45 (26.3)        | 0.584  |
| Mitral valve repair                               | 259 (28.6)       | 75 (43.9)        | 0.021  |

|                        |            |           |       |
|------------------------|------------|-----------|-------|
| Tricuspid annuloplasty | 319 (35.2) | 44 (25.7) | 0.108 |
| Concomitant CABG       | 107 (11.8) | 14 (8.2)  | 0.287 |

Values are expressed as median (interquartile range) or number (percentage). P value by Mann-Whitney U test for non-normally distributed continuous variables; P value by  $\chi^2$  test for categorical variables.

Abbreviations: ACEI, angiotensin-converting enzyme inhibitors; ARB, angiotensin II receptor blockers; ALP, alkaline phosphatase; ALT, alanine aminotransaminase; AR, aortic regurgitation; AS, aortic stenosis; AST, aspartate aminotransferase; CABG, coronary artery bypass grafting; eGFR, estimated glomerular filtration rate; EuroSCORE II, European System for Cardiac Operative Risk Evaluation II; LVEF, left ventricular ejection fraction; PASP, pulmonary artery systolic pressure; MR, mitral regurgitation; MS, mitral stenosis; NYHA, New York Heart Association; STS score, Society of Thoracic Surgeons Predicted Risk of Mortality Score; TR, tricuspid regurgitation.

Table S2A. Univariate and multivariate logistic regression models showing predictors of baseline concomitant hepatorenal dysfunction (MELD-XI) and malnutrition (CONUT) (severe) in patients undergoing valvular surgery

|                                                               | Univariate analysis |         | Multivariate analysis<br>(EuroSCORE II model) |         | Multivariate analysis<br>(STS Score model) |         |
|---------------------------------------------------------------|---------------------|---------|-----------------------------------------------|---------|--------------------------------------------|---------|
|                                                               | OR (95% CI)         | P value | OR (95% CI)                                   | P value | OR (95% CI)                                | P value |
| <b>Demographic and anthropometric characteristics</b>         |                     |         |                                               |         |                                            |         |
| Age, years                                                    | 1.04 (1.02-1.06)    | <0.001  |                                               |         |                                            |         |
| Male                                                          | 1.92 (1.38-2.70)    | <0.001  |                                               |         |                                            |         |
| Body mass index, kg/m <sup>2</sup>                            | 0.96 (0.92-1.01)    | 0.087   |                                               |         |                                            |         |
| NYHA functional class<br>III/IV                               | 2.96 (1.75-4.92)    | <0.001  |                                               |         |                                            |         |
| <b>Cardiovascular risk factors and cardiovascular disease</b> |                     |         |                                               |         |                                            |         |
| Hypertension                                                  | 1.35 (0.95-1.90)    | 0.087   |                                               |         |                                            |         |
| Diabetes Mellitus                                             | 2.55 (1.74-3.71)    | <0.001  |                                               |         |                                            |         |
| Smoking                                                       | 1.36 (0.91-2.01)    | 0.122   |                                               |         |                                            |         |
| Dyslipidemia                                                  | 1.08 (0.74-1.55)    | 0.698   |                                               |         |                                            |         |
| Prior myocardial<br>infarction                                | 1.56 (0.71-3.19)    | 0.240   |                                               |         |                                            |         |
| Prior stroke                                                  | 1.84 (1.09-3.02)    | 0.019   | 1.33 (0.69-2.47)                              | 0.378   | 1.67 (0.86-3.21)                           | 0.131   |
| Atrial fibrillation                                           | 2.23 (1.58-3.18)    | <0.001  | 1.10 (0.67-1.83)                              | 0.714   | 1.15 (0.70-1.89)                           | 0.585   |
| Heart failure                                                 | 2.45 (1.76-3.45)    | <0.001  | 1.43 (0.93-2.21)                              | 0.108   | 1.42 (0.91-2.23)                           | 0.123   |

| <b>Valvular heart disease and echocardiographic variables</b> |                     |        |                     |        |                     |        |
|---------------------------------------------------------------|---------------------|--------|---------------------|--------|---------------------|--------|
| MS $\geq$ moderate                                            | 0.83 (0.55-1.24)    | 0.379  |                     |        |                     |        |
| MR $\geq$ moderate                                            | 1.40 (1.01-1.96)    | 0.045  | 1.15 (0.73-1.81)    | 0.548  |                     |        |
| AS $\geq$ moderate                                            | 0.78 (0.54-1.12)    | 0.188  |                     |        |                     |        |
| AR $\geq$ moderate                                            | 0.86 (0.58-1.26)    | 0.450  |                     |        |                     |        |
| TR $\geq$ moderate                                            | 3.12 (2.22-4.40)    | <0.001 | 1.93 (1.17-3.21)    | 0.010  |                     |        |
| LV Mass, g                                                    | 1.004 (1.002-1.005) | <0.001 | 1.005 (1.003-1.008) | <0.001 | 1.008 (1.005-1.010) | <0.001 |
| LVEF, %                                                       | 0.97 (0.95-0.98)    | <0.001 |                     |        |                     |        |
| PASP, mmHg                                                    | 1.03 (1.02-1.05)    | <0.001 | 1.02 (1.01-1.04)    | 0.005  | 1.03 (1.01-1.04)    | <0.001 |
| <b>Cardiac surgery risk-stratification models</b>             |                     |        |                     |        |                     |        |
| EuroSCORE II                                                  | 1.16 (1.11-1.21)    | <0.001 | 1.17 (1.11-1.24)    | <0.001 |                     |        |
| STS Score                                                     | 1.45 (1.33-1.57)    | <0.001 |                     |        | 1.39 (1.26-1.53)    | <0.001 |

Abbreviations: AR, aortic regurgitation; AS, aortic stenosis; CI, confidence interval; CONUT, Controlling Nutritional Status score; EuroSCORE II, European System for Cardiac Operative Risk Evaluation II; LV, left ventricle; LVEF, left ventricular ejection fraction; PASP, pulmonary artery systolic pressure; MELD-XI, Model for End-Stage Liver Disease excluding international normalized ratio; MR, mitral regurgitation; MS, mitral stenosis; NYHA, New York Heart Association; OR, odds ratio; STS score, Society of Thoracic Surgeons Predicted Risk of Mortality Score; TR, tricuspid regurgitation.

Table S2B. Competing Risk Analysis of baseline hepatorenal function (MELD-XI) and nutritional status (CONUT) for predicting heart failure hospitalization

|                                                                           | <b>Unadjusted</b> | <b>EuroSCORE II model*</b> | <b>STS Score model†</b> |
|---------------------------------------------------------------------------|-------------------|----------------------------|-------------------------|
|                                                                           | SHR (95% CI)      | SHR (95% CI)               | SHR (95% CI)            |
| <b>Combined evaluation of hepatorenal function and nutritional status</b> |                   |                            |                         |
| Normal<br>(Normal hepatorenal function and well-nourished)                | 1.00              | 1.00                       | 1.00                    |
| Mild<br>(Hepatorenal dysfunction or malnutrition)                         | 3.08 (1.78-5.35)  | 2.08 (1.23-3.52)           | 1.87 (1.08-3.24)        |
| Severe<br>(Hepatorenal dysfunction and malnutrition)                      | 5.77 (3.26-10.23) | 3.09 (1.73-5.50)           | 2.95 (1.59-5.47)        |

\*Adjusted for atrial fibrillation, heart failure, significant tricuspid regurgitation, pulmonary artery systolic pressure, and EuroSCORE II (P<0.05 on univariate analysis).

†Adjusted for atrial fibrillation, heart failure, pulmonary artery systolic pressure, and STS Score (P<0.05 on univariate analysis).

Abbreviations: CI, confidence interval; CONUT, Controlling Nutritional Status score; EuroSCORE II, European System for Cardiac Operative Risk Evaluation II; MELD-XI, Model for End-Stage Liver Disease excluding international normalized ratio; SHR, subdistribution hazard ratio; STS score, Society of Thoracic Surgeons Predicted Risk of Mortality Score.



Table S2C. Competing Risk Analysis of baseline hepatorenal function (MELD-XI) and nutritional status (CONUT) for predicting cardiovascular death

|                                                                           | <b>Unadjusted</b> | <b>EuroSCORE II model*</b> | <b>STS Score model†</b> |
|---------------------------------------------------------------------------|-------------------|----------------------------|-------------------------|
|                                                                           | SHR (95% CI)      | SHR (95% CI)               | SHR (95% CI)            |
| <b>Combined evaluation of hepatorenal function and nutritional status</b> |                   |                            |                         |
| Normal<br>(Normal hepatorenal function and well-nourished)                | 1.00              | 1.00                       | 1.00                    |
| Mild<br>(Hepatorenal dysfunction or malnutrition)                         | 3.97 (1.36-11.6)  | 3.29 (1.14-9.52)           | 3.66 (1.24-10.82)       |
| Severe<br>(Hepatorenal dysfunction and malnutrition)                      | 14.70 (5.17-41.7) | 9.29 (3.09-27.99)          | 10.52 (3.49-31.74)      |

\*Adjusted for hypertension, significant tricuspid regurgitation, and EuroSCORE II (P<0.05 on univariate analysis).

†Adjusted for hypertension and STS Score (P<0.05 on univariate analysis).

Abbreviations: CI, confidence interval; CONUT, Controlling Nutritional Status score; EuroSCORE II, European System for Cardiac Operative Risk Evaluation II; MELD-XI, Model for End-Stage Liver Disease excluding international normalized ratio; SHR, subdistribution hazard ratio; STS score, Society of Thoracic Surgeons Predicted Risk of Mortality Score.

Table S2D. Cox proportional hazards analyses of baseline hepatorenal function (MELD-XI) and nutritional status (CONUT) for predicting adverse events

|                                                               | <b>Overall Population</b>  |         |                                                       |         |                                                    |         |
|---------------------------------------------------------------|----------------------------|---------|-------------------------------------------------------|---------|----------------------------------------------------|---------|
|                                                               | <b>Univariate analysis</b> |         | <b>Multivariate analysis<br/>(EuroSCORE II Model)</b> |         | <b>Multivariate analysis<br/>(STS Score Model)</b> |         |
|                                                               | HR (95% CI)                | P value | HR (95% CI)                                           | P value | HR (95% CI)                                        | P value |
| <b>Demographic and anthropometric characteristics</b>         |                            |         |                                                       |         |                                                    |         |
| Age, years                                                    | 1.05 (1.04-1.07)           | <0.001  |                                                       |         |                                                    |         |
| Male                                                          | 1.06 (0.79-1.40)           | 0.713   |                                                       |         |                                                    |         |
| Body mass index,<br>kg/m <sup>2</sup>                         | 1.02 (0.98-1.06)           | 0.428   |                                                       |         |                                                    |         |
| NYHA Class III/IV                                             | 1.69 (1.09-2.64)           | 0.020   |                                                       |         |                                                    |         |
| <b>Cardiovascular risk factors and cardiovascular disease</b> |                            |         |                                                       |         |                                                    |         |
| Hypertension                                                  | 1.52 (1.14-2.04)           | 0.005   | 1.61 (1.10-2.36)                                      | 0.013   |                                                    |         |
| Diabetes Mellitus                                             | 2.41 (1.78-3.27)           | <0.001  |                                                       |         |                                                    |         |
| Smoking                                                       | 1.16 (0.82-1.64)           | 0.391   |                                                       |         |                                                    |         |
| Dyslipidemia                                                  | 1.49 (1.10-2.02)           | 0.009   | 1.02 (0.69-1.51)                                      | 0.926   | 1.05 (0.72-1.54)                                   | 0.802   |
| Prior myocardial<br>infarction                                | 2.16 (1.27-3.65)           | 0.004   |                                                       |         |                                                    |         |
| Prior stroke                                                  | 1.91 (1.28-2.86)           | 0.002   | 1.33 (0.84-2.11)                                      | 0.217   | 1.39 (0.86-2.26)                                   | 0.177   |
| Atrial fibrillation                                           | 1.63 (1.22-2.20)           | 0.001   | 1.01 (0.63-1.62)                                      | 0.957   | 1.19 (0.72-1.95)                                   | 0.497   |

|                                                               |                     |        |                  |        |                  |       |
|---------------------------------------------------------------|---------------------|--------|------------------|--------|------------------|-------|
| Heart failure                                                 | 2.45 (1.82-3.29)    | <0.001 | 2.23 (1.55-3.20) | <0.001 |                  |       |
| <b>Laboratory examination</b>                                 |                     |        |                  |        |                  |       |
| Hemoglobin, g/dL                                              | 0.73 (0.68-0.79)    | <0.001 |                  |        |                  |       |
| eGFR, ml/min/1.73m <sup>2</sup>                               | 0.974 (0.969-0.980) | <0.001 |                  |        |                  |       |
| Total bilirubin, mg/dL                                        | 1.32 (1.13-1.55)    | <0.001 |                  |        |                  |       |
| Total cholesterol, mg/dL                                      | 0.987 (0.983-0.991) | <0.001 |                  |        |                  |       |
| Albumin, mg/dL                                                | 0.40 (0.29-0.56)    | <0.001 |                  |        |                  |       |
| <b>Valvular heart disease and echocardiographic variables</b> |                     |        |                  |        |                  |       |
| MS ≥ moderate                                                 | 1.12 (0.80-1.57)    | 0.519  |                  |        |                  |       |
| MR ≥ moderate                                                 | 0.74 (0.55-0.99)    | 0.042  | 0.51 (0.36-0.73) | <0.001 |                  |       |
| AS ≥ moderate                                                 | 1.12 (0.83-1.53)    | 0.456  |                  |        |                  |       |
| AR ≥ moderate                                                 | 0.80 (0.57-1.13)    | 0.199  |                  |        |                  |       |
| TR ≥ moderate                                                 | 2.01 (1.51-2.67)    | <0.001 | 1.44 (0.89-2.33) | 0.138  |                  |       |
| Chronic Rheumatic Heart Disease                               | 1.39 (1.03-1.88)    | 0.031  | 1.15 (0.78-1.69) | 0.474  | 0.96 (0.63-1.44) | 0.829 |
| LV Mass, g                                                    | 1.001 (0.999-1.002) | 0.328  |                  |        |                  |       |
| LVEF, %                                                       | 0.97 (0.96-0.99)    | <0.001 |                  |        |                  |       |
| PASP, mmHg                                                    | 1.02 (1.01-1.02)    | 0.003  | 1.00 (0.99-1.01) | 0.461  | 1.00 (0.99-1.01) | 0.913 |
| <b>Medications</b>                                            |                     |        |                  |        |                  |       |
| ACEI                                                          | 1.62 (1.21-2.16)    | 0.001  | 1.40 (0.99-1.97) | 0.057  | 1.78 (1.26-2.51) | 0.001 |

|                                                   |                  |        |                  |        |                  |        |
|---------------------------------------------------|------------------|--------|------------------|--------|------------------|--------|
| ARB                                               | 1.04 (0.70-1.53) | 0.848  |                  |        |                  |        |
| Beta blockers                                     | 0.95 (0.71-1.28) | 0.748  |                  |        |                  |        |
| Calcium channel blockers                          | 0.97 (0.68-1.39) | 0.884  |                  |        |                  |        |
| Digoxin                                           | 1.42 (1.06-1.91) | 0.019  |                  |        |                  |        |
| Statin                                            | 1.27 (0.95-1.69) | 0.101  |                  |        |                  |        |
| Warfarin                                          | 1.68 (1.26-2.23) | <0.001 | 1.11 (0.70-1.76) | 0.645  | 0.96 (0.60-1.54) | 0.866  |
| <b>Valvular surgery details</b>                   |                  |        |                  |        |                  |        |
| Aortic valve replacement                          | 1.13 (0.85-1.51) | 0.395  |                  |        |                  |        |
| Mitral valve procedure                            | 0.99 (0.74-1.33) | 0.958  |                  |        |                  |        |
| Mitral valve replacement                          | 1.10 (0.82-1.48) | 0.547  |                  |        |                  |        |
| Mitral valve repair                               | 0.91 (0.65-1.25) | 0.527  |                  |        |                  |        |
| Tricuspid annuloplasty                            | 1.66 (1.25-2.21) | <0.001 | 1.06 (0.67-1.67) | 0.797  | 1.24 (0.84-1.82) | 0.282  |
| Concomitant CABG                                  | 1.27 (0.85-1.91) | 0.248  |                  |        |                  |        |
| <b>Cardiac surgery risk-stratification models</b> |                  |        |                  |        |                  |        |
| EuroScore II                                      | 1.06 (1.05-1.07) | <0.001 | 1.04 (1.02-1.06) | <0.001 |                  |        |
| STS Score                                         | 1.26 (1.20-1.32) | <0.001 |                  |        | 1.16 (1.09-1.23) | <0.001 |

| <b>Combined evaluation of hepatorenal function and nutritional status</b> |                   |        |                  |        |                  |        |
|---------------------------------------------------------------------------|-------------------|--------|------------------|--------|------------------|--------|
| Normal<br>(Normal hepatorenal function and well-nourished)                | 1.00              |        | 1.00             |        | 1.00             |        |
| Mild<br>(Hepatorenal dysfunction or malnutrition)                         | 3.19 (2.03-4.99)  | <0.001 | 2.11 (1.25-3.55) | 0.005  | 1.97 (1.18-3.32) | 0.010  |
| Severe<br>(Hepatorenal dysfunction and malnutrition)                      | 7.22 (4.56-11.44) | <0.001 | 3.55 (2.04-6.16) | <0.001 | 3.17 (1.80-5.62) | <0.001 |

Abbreviations: ACEI, angiotensin-converting enzyme inhibitors; ARB, angiotensin II receptor blockers; ALP, alkaline phosphatase; ALT, alanine aminotransaminase; AR, aortic regurgitation; AS, aortic stenosis; AST, aspartate aminotransferase; CABG, coronary artery bypass grafting; CI, confidence interval; CONUT, Controlling Nutritional Status score; eGFR, estimated glomerular filtration rate; EuroSCORE II, European System for Cardiac Operative Risk Evaluation II; HR, hazard ratio; LVEF, left ventricular ejection fraction; PASP, pulmonary artery systolic pressure; MELD-XI, Model for End-Stage Liver Disease excluding international normalized ratio; MR, mitral regurgitation; MS, mitral stenosis; NYHA, New York Heart Association; STS score, Society of Thoracic Surgeons Predicted Risk of Mortality Score; TR, tricuspid regurgitation.

Table S3A. Cox proportional hazards analyses of baseline hepatorenal function (MELD-XI) and nutritional status (CONUT) for predicting all-cause mortality and adverse events in patients undergoing aortic valve replacement (n=460)

|                                                                           | <b>Multivariate analysis</b> |         |                  |         |                        |         |                  |         |
|---------------------------------------------------------------------------|------------------------------|---------|------------------|---------|------------------------|---------|------------------|---------|
|                                                                           | <b>EuroSCORE II model</b>    |         |                  |         | <b>STS Score model</b> |         |                  |         |
|                                                                           | All-cause mortality*         |         | Adverse events†  |         | All-cause mortality‡   |         | Adverse events§  |         |
|                                                                           | HR (95% CI)                  | P value | HR (95% CI)      | P value | HR (95% CI)            | P value | HR (95% CI)      | P value |
| <b>Separate evaluation of hepatorenal function and nutritional status</b> |                              |         |                  |         |                        |         |                  |         |
| <u>Hepatorenal dysfunction</u>                                            |                              |         |                  |         |                        |         |                  |         |
| MELD-XI, continuous                                                       | 1.14 (1.09-1.19)             | <0.001  | 1.07 (1.03-1.12) | 0.002   | 1.12 (1.07-1.18)       | <0.001  | 1.08 (1.02-1.13) | 0.004   |
| MELD-XI, categorical                                                      |                              |         |                  |         |                        |         |                  |         |
| Hepatorenal dysfunction (MELD-XI >12.43)                                  | 2.96 (1.69- 5.16)            | <0.001  | 2.28 (1.42-3.67) | <0.001  | 3.16 (1.79-5.59)       | <0.001  | 2.39 (1.43-4.02) | <0.001  |
| <u>Nutritional status</u>                                                 |                              |         |                  |         |                        |         |                  |         |
| CONUT, continuous                                                         | 1.43 (1.24-1.66)             | <0.001  | 1.32 (1.14-1.53) | <0.001  | 1.46 (1.27-1.68)       | <0.001  | 1.31 (1.13-1.52) | <0.001  |
| CONUT, categorical                                                        |                              |         |                  |         |                        |         |                  |         |
| Normal nutrition                                                          | Referent                     |         | Referent         |         | Referent               |         | Referent         |         |

|                                                                           |                   |        |                   |        |                    |        |                   |        |
|---------------------------------------------------------------------------|-------------------|--------|-------------------|--------|--------------------|--------|-------------------|--------|
| Mild malnutrition                                                         | 3.97 (1.76-8.93)  | <0.001 | 2.88 (1.47-5.64)  | 0.002  | 4.72 (1.97-11.30)  | <0.001 | 3.10 (1.52-6.34)  | 0.002  |
| Moderate to severe malnutrition                                           | 8.07 (2.98-21.84) | <0.001 | 5.73 (2.40-13.64) | <0.001 | 10.37 (3.68-29.26) | <0.001 | 5.78 (2.34-14.28) | <0.001 |
| <b>Combined evaluation of hepatorenal function and nutritional status</b> |                   |        |                   |        |                    |        |                   |        |
| Normal (Normal hepatorenal function and well-nourished)                   | Referent          |        | Referent          |        | Referent           |        | Referent          |        |
| Mild (Hepatorenal dysfunction or malnutrition)                            | 4.36 (1.68-11.33) | 0.003  | 2.56 (1.25-5.23)  | 0.010  | 4.40 (1.68-11.52)  | 0.003  | 2.49 (1.20-5.19)  | 0.014  |
| Severe (Hepatorenal dysfunction and malnutrition)                         | 9.50 (3.49-25.85) | <0.001 | 4.76 (2.24-10.13) | <0.001 | 10.57 (3.88-28.85) | <0.001 | 5.15 (2.35-11.27) | <0.001 |

\*Adjusted for hypertension, heart failure, concomitant mitral valve procedure, concomitant tricuspid annuloplasty, and EuroSCORE II (P<0.05 on univariate analysis).

†Adjusted for hypertension, atrial fibrillation, prior stroke, baseline warfarin therapy, pulmonary artery systolic pressure, concomitant mitral valve procedure, concomitant tricuspid annuloplasty, and EuroSCORE II (P<0.05 on univariate analysis).

‡Adjusted for concomitant mitral valve procedure, concomitant tricuspid annuloplasty, and STS Score (P<0.05 on univariate analysis).

§Adjusted for atrial fibrillation, prior stroke, baseline warfarin therapy, pulmonary artery systolic pressure, concomitant mitral valve procedure, concomitant tricuspid annuloplasty, and EuroSCORE II (P<0.05 on univariate analysis).

Abbreviations: CI, confidence interval; CONUT, Controlling Nutritional Status score; EuroSCORE II, European System for Cardiac Operative Risk Evaluation II; HR, hazard ratio; MELD-XI, Model for End-Stage Liver Disease excluding international normalized ratio; STS score, Society of Thoracic Surgeons Predicted Risk of Mortality Score.



Table S3B. Cox proportional hazards analyses of baseline hepatorenal function (MELD-XI) and nutritional status (CONUT) for predicting all-cause mortality and adverse events in patients undergoing mitral valve procedure (mitral valve replacement or mitral valve repair) (n=554)

|                                                                           | <b>Multivariate analysis</b> |         |                  |         |                        |         |                  |         |
|---------------------------------------------------------------------------|------------------------------|---------|------------------|---------|------------------------|---------|------------------|---------|
|                                                                           | <b>EuroSCORE II model</b>    |         |                  |         | <b>STS Score model</b> |         |                  |         |
|                                                                           | All-cause mortality*         |         | Adverse events†  |         | All-cause mortality‡   |         | Adverse events§  |         |
|                                                                           | HR (95% CI)                  | P value | HR (95% CI)      | P value | HR (95% CI)            | P value | HR (95% CI)      | P value |
| <b>Separate evaluation of hepatorenal function and nutritional status</b> |                              |         |                  |         |                        |         |                  |         |
| <u>Hepatorenal dysfunction</u>                                            |                              |         |                  |         |                        |         |                  |         |
| MELD-XI, continuous                                                       | 1.12 (1.08-1.17)             | <0.001  | 1.06 (1.02-1.10) | 0.002   | 1.11 (1.06-1.16)       | <0.001  | 1.04 (1.00-1.08) | 0.034   |
| MELD-XI, categorical                                                      |                              |         |                  |         |                        |         |                  |         |
| Hepatorenal dysfunction (MELD-XI >12.43)                                  | 4.13 (2.23-7.63)             | <0.001  | 1.85 (1.25-2.74) | 0.002   | 3.85 (2.02-7.32)       | <0.001  | 1.72 (1.14-2.59) | 0.012   |
| <u>Nutritional status</u>                                                 |                              |         |                  |         |                        |         |                  |         |
| CONUT, continuous                                                         | 1.61 (1.34-1.93)             | <0.001  | 1.33 (1.18-1.50) | <0.001  | 1.54 (1.28-1.86)       | <0.001  | 1.30 (1.15-1.47) | <0.001  |
| CONUT, categorical                                                        |                              |         |                  |         |                        |         |                  |         |
| Normal nutrition                                                          | Referent                     |         | Referent         |         | Referent               |         | Referent         |         |

|                                                                           |                    |        |                  |        |                    |        |                  |        |
|---------------------------------------------------------------------------|--------------------|--------|------------------|--------|--------------------|--------|------------------|--------|
| Mild malnutrition                                                         | 7.16 (2.16-23.70)  | 0.001  | 2.13 (1.28-3.52) | 0.004  | 6.75 (2.03-22.45)  | 0.002  | 1.94 (1.16-3.26) | 0.012  |
| Moderate to severe malnutrition                                           | 20.24 (5.55-73.82) | <0.001 | 5.33 (2.84-9.99) | <0.001 | 15.34 (4.08-57.60) | <0.001 | 4.39 (2.30-8.39) | <0.001 |
| <b>Combined evaluation of hepatorenal function and nutritional status</b> |                    |        |                  |        |                    |        |                  |        |
| Normal (Normal hepatorenal function and well-nourished)                   | Referent           |        | Referent         |        | Referent           |        | Referent         |        |
| Mild (Hepatorenal dysfunction or malnutrition)                            | 3.71 (1.06-12.93)  | 0.040  | 2.14 (1.22-3.75) | 0.008  | 3.55 (1.01-12.46)  | 0.048  | 2.01 (1.14-3.55) | 0.016  |
| Severe (Hepatorenal dysfunction and malnutrition)                         | 14.81 (4.37-50.24) | <0.001 | 3.60 (1.99-6.51) | <0.001 | 13.17 (3.83-45.29) | <0.001 | 3.16 (1.71-5.84) | <0.001 |

\*Adjusted for hypertension, concomitant aortic valve replacement, concomitant tricuspid annuloplasty, and EuroSCORE II (P<0.05 on univariate analysis).

†Adjusted for hypertension, dyslipidemia, prior myocardial infarction, concomitant aortic valve replacement, concomitant tricuspid annuloplasty, concomitant coronary artery bypass grafting, and EuroSCORE II (P<0.05 on univariate analysis).

‡Adjusted for concomitant aortic valve replacement, concomitant tricuspid annuloplasty, and STS Score (P<0.05 on univariate analysis).

§Adjusted for dyslipidemia, prior myocardial infarction, concomitant aortic valve replacement, concomitant tricuspid annuloplasty, concomitant coronary artery bypass grafting, and STS Score (P<0.05 on univariate analysis).

Abbreviations: CI, confidence interval; CONUT, Controlling Nutritional Status score; EuroSCORE II, European System for Cardiac Operative Risk Evaluation II; HR, hazard ratio; MELD-XI, Model for End-Stage Liver Disease excluding international normalized ratio; STS score, Society of Thoracic Surgeons Predicted Risk of Mortality Score.

Table S3C. Cox proportional hazards analyses of baseline hepatorenal function (MELD-XI) and nutritional status (CONUT) for predicting all-cause mortality and adverse events in valvular heart disease of rheumatic etiology (n=259)

|                                                                           | <b>Multivariate analysis</b> |         |                  |         |                        |         |                  |         |
|---------------------------------------------------------------------------|------------------------------|---------|------------------|---------|------------------------|---------|------------------|---------|
|                                                                           | <b>EuroSCORE II model</b>    |         |                  |         | <b>STS Score model</b> |         |                  |         |
|                                                                           | All-cause mortality*         |         | Adverse events†  |         | All-cause mortality‡   |         | Adverse events§  |         |
|                                                                           | HR (95% CI)                  | P value | HR (95% CI)      | P value | HR (95% CI)            | P value | HR (95% CI)      | P value |
| <b>Separate evaluation of hepatorenal function and nutritional status</b> |                              |         |                  |         |                        |         |                  |         |
| <u>Hepatorenal dysfunction</u>                                            |                              |         |                  |         |                        |         |                  |         |
| MELD-XI, continuous                                                       | 1.16 (1.09-1.25)             | <0.001  | 1.10 (1.03-1.17) | 0.004   | 1.28 (1.12-1.47)       | <0.001  | 1.12 (1.01-1.24) | 0.032   |
| MELD-XI, categorical                                                      |                              |         |                  |         |                        |         |                  |         |
| Hepatorenal dysfunction (MELD-XI >12.43)                                  | 3.58 (1.82-7.06)             | <0.001  | 1.89 (1.13-3.14) | 0.015   | 3.72 (1.69-8.18)       | 0.001   | 1.86 (1.04-3.32) | 0.035   |
| <u>Nutritional status</u>                                                 |                              |         |                  |         |                        |         |                  |         |
| CONUT, continuous                                                         | 1.90 (1.50-2.41)             | <0.001  | 1.44 (1.22-1.70) | <0.001  | 1.93 (1.45-2.56)       | <0.001  | 1.34 (1.10-1.63) | 0.003   |
| CONUT, categorical                                                        |                              |         |                  |         |                        |         |                  |         |
| Normal nutrition                                                          | Referent                     |         | Referent         |         | Referent               |         | Referent         |         |

|                                                                           |                     |        |                   |        |                     |        |                   |        |
|---------------------------------------------------------------------------|---------------------|--------|-------------------|--------|---------------------|--------|-------------------|--------|
| Mild malnutrition                                                         | 9.70 (2.15-43.84)   | 0.003  | 4.87 (2.26-10.48) | <0.001 | 6.91 (1.60-29.84)   | 0.010  | 3.47 (1.60-7.52)  | 0.002  |
| Moderate to severe malnutrition                                           | 32.94 (6.51-166.67) | <0.001 | 6.77 (2.60-17.64) | <0.001 | 22.90 (4.33-121.28) | <0.001 | 4.10 (1.33-12.65) | 0.014  |
| <b>Combined evaluation of hepatorenal function and nutritional status</b> |                     |        |                   |        |                     |        |                   |        |
| Normal (Normal hepatorenal function and well-nourished)                   | Referent            |        | Referent          |        | Referent            |        | Referent          |        |
| Mild (Hepatorenal dysfunction or malnutrition)                            | 5.85 (1.30-26.38)   | 0.022  | 5.03 (2.16-11.69) | <0.001 | 4.60 (1.02-20.72)   | 0.047  | 3.36 (1.45-7.77)  | 0.005  |
| Severe (Hepatorenal dysfunction and malnutrition)                         | 15.22 (3.53-65.73)  | <0.001 | 5.99 (2.55-14.07) | <0.001 | 14.64 (3.20-66.88)  | <0.001 | 4.91 (1.98-12.20) | <0.001 |

\*Adjusted for EuroSCORE II (P<0.05 on univariate analysis).

†Adjusted for heart failure, mitral valve replacement, and EuroSCORE II (P<0.05 on univariate analysis).

‡Adjusted for STS Score (P<0.05 on univariate analysis).

§Adjusted for mitral valve replacement and STS Score (P<0.05 on univariate analysis).

Abbreviations: CI, confidence interval; CONUT, Controlling Nutritional Status score; EuroSCORE II, European System for Cardiac Operative Risk Evaluation II; HR, hazard ratio; MELD-XI, Model for End-Stage Liver Disease excluding international normalized ratio; STS score, Society of Thoracic Surgeons Predicted Risk of Mortality Score.

Table S3D. Cox proportional hazards analyses of baseline hepatorenal function (MELD-XI) and nutritional status (CONUT) for predicting all-cause mortality and adverse events in valvular heart disease of non-rheumatic etiology (n=650)

|                                                                           | <b>Multivariate analysis</b> |         |                  |         |                        |         |                  |         |
|---------------------------------------------------------------------------|------------------------------|---------|------------------|---------|------------------------|---------|------------------|---------|
|                                                                           | <b>EuroSCORE II model</b>    |         |                  |         | <b>STS Score model</b> |         |                  |         |
|                                                                           | All-cause mortality*         |         | Adverse events†  |         | All-cause mortality‡   |         | Adverse events§  |         |
|                                                                           | HR (95% CI)                  | P value | HR (95% CI)      | P value | HR (95% CI)            | P value | HR (95% CI)      | P value |
| <b>Separate evaluation of hepatorenal function and nutritional status</b> |                              |         |                  |         |                        |         |                  |         |
| <u>Hepatorenal dysfunction</u>                                            |                              |         |                  |         |                        |         |                  |         |
| MELD-XI, continuous                                                       | 1.13 (1.09-1.17)             | <0.001  | 1.09 (1.05-1.13) | <0.001  | 1.08 (1.03-1.13)       | <0.001  | 1.04 (1.00-1.08) | 0.057   |
| MELD-XI, categorical                                                      |                              |         |                  |         |                        |         |                  |         |
| Hepatorenal dysfunction (MELD-XI >12.43)                                  | 3.08 (1.81-5.24)             | <0.001  | 2.03 (1.36-3.02) | <0.001  | 2.38 (1.33-4.24)       | 0.003   | 1.80 (1.17-2.78) | 0.008   |
| <u>Nutritional status</u>                                                 |                              |         |                  |         |                        |         |                  |         |
| CONUT, continuous                                                         | 1.44 (1.25-1.66)             | <0.001  | 1.33 (1.19-1.48) | <0.001  | 1.39 (1.20-1.61)       | <0.001  | 1.30 (1.17-1.45) | <0.001  |
| CONUT, categorical                                                        |                              |         |                  |         |                        |         |                  |         |
| Normal nutrition                                                          | Referent                     |         | Referent         |         | Referent               |         | Referent         |         |

|                                                                           |                   |        |                  |        |                   |        |                  |        |
|---------------------------------------------------------------------------|-------------------|--------|------------------|--------|-------------------|--------|------------------|--------|
| Mild malnutrition                                                         | 2.99 (1.37-6.54)  | 0.006  | 1.89 (1.14-3.11) | 0.013  | 3.03 (1.32-6.97)  | 0.009  | 1.71 (1.02-2.88) | 0.043  |
| Moderate to severe malnutrition                                           | 8.47 (3.43-20.93) | <0.001 | 4.80 (2.64-8.75) | <0.001 | 6.79 (2.61-17.67) | <0.001 | 3.95 (2.07-7.55) | <0.001 |
| <b>Combined evaluation of hepatorenal function and nutritional status</b> |                   |        |                  |        |                   |        |                  |        |
| Normal (Normal hepatorenal function and well-nourished)                   | Referent          |        | Referent         |        | Referent          |        | Referent         |        |
| Mild (Hepatorenal dysfunction or malnutrition)                            | 2.88 (1.17-7.10)  | 0.021  | 2.13 (1.21-3.76) | 0.009  | 2.69 (1.09-6.67)  | 0.032  | 1.97 (1.11-3.50) | 0.020  |
| Severe (Hepatorenal dysfunction and malnutrition)                         | 7.88 (3.12-19.95) | <0.001 | 3.81 (2.08-6.99) | <0.001 | 5.88 (2.28-15.17) | <0.001 | 3.13 (1.65-5.97) | <0.001 |

\*Adjusted for hypertension, dyslipidemia, significant tricuspid regurgitation, aortic valve replacement, and EuroSCORE II (P<0.05 on univariate analysis).



†Adjusted for hypertension, dyslipidemia, atrial fibrillation, heart failure, baseline medical therapy (statin and warfarin), type of valvular surgery, and EuroSCORE II (P<0.05 on univariate analysis).

‡Adjusted for dyslipidemia, aortic valve replacement, and STS Score (P<0.05 on univariate analysis).

§Adjusted for dyslipidemia, atrial fibrillation, baseline medical therapy (statin and warfarin), type of valvular surgery, and STS Score (P<0.05 on univariate analysis).

Abbreviations: CI, confidence interval; CONUT, Controlling Nutritional Status score; EuroSCORE II, European System for Cardiac Operative Risk Evaluation II; HR, hazard ratio; MELD-XI, Model for End-Stage Liver Disease excluding international normalized ratio; STS score, Society of Thoracic Surgeons Predicted Risk of Mortality Score.

Table S4. Cox proportional hazards analyses of baseline hepatorenal function (MELD-XI) and nutritional status (CONUT) for predicting all-cause mortality and adverse events at least 30 days after valvular surgery (n=892)

|                                                                           | <b>Multivariate analysis</b> |         |                  |         |                        |         |                  |         |
|---------------------------------------------------------------------------|------------------------------|---------|------------------|---------|------------------------|---------|------------------|---------|
|                                                                           | <b>EuroSCORE II model</b>    |         |                  |         | <b>STS Score model</b> |         |                  |         |
|                                                                           | All-cause mortality*         |         | Adverse events†  |         | All-cause mortality‡   |         | Adverse events§  |         |
|                                                                           | HR (95% CI)                  | P value | HR (95% CI)      | P value | HR (95% CI)            | P value | HR (95% CI)      | P value |
| <b>Separate evaluation of hepatorenal function and nutritional status</b> |                              |         |                  |         |                        |         |                  |         |
| <u>Hepatorenal dysfunction</u>                                            |                              |         |                  |         |                        |         |                  |         |
| MELD-XI, continuous                                                       | 1.15 (1.11-1.19)             | <0.001  | 1.08 (1.04-1.12) | <0.001  | 1.12 (1.08-1.17)       | <0.001  | 1.06 (1.02-1.10) | 0.006   |
| MELD-XI, categorical                                                      |                              |         |                  |         |                        |         |                  |         |
| Hepatorenal dysfunction (MELD-XI >12.43)                                  | 3.03 (1.90-4.81)             | <0.001  | 1.69 (1.17-2.42) | 0.005   | 2.81 (1.69-4.68)       | <0.001  | 1.51 (1.02-2.24) | 0.041   |
| <u>Nutritional status</u>                                                 |                              |         |                  |         |                        |         |                  |         |
| CONUT, continuous                                                         | 1.41 (1.24-1.61)             | <0.001  | 1.29 (1.16-1.42) | <0.001  | 1.44 (1.27-1.64)       | <0.001  | 1.25 (1.12-1.39) | <0.001  |
| CONUT, categorical                                                        |                              |         |                  |         |                        |         |                  |         |
| Normal nutrition                                                          | Referent                     |         | Referent         |         | Referent               |         | Referent         |         |

|                                                                           |                   |        |                  |        |                    |        |                  |        |
|---------------------------------------------------------------------------|-------------------|--------|------------------|--------|--------------------|--------|------------------|--------|
| Mild malnutrition                                                         | 3.79 (1.78-8.08)  | <0.001 | 2.05 (1.28-3.26) | 0.003  | 4.47 (2.00-10.00)  | <0.001 | 1.96 (1.21-3.20) | 0.007  |
| Moderate to severe malnutrition                                           | 8.88 (3.74-21.06) | <0.001 | 4.51 (2.57-7.91) | <0.001 | 10.58 (4.19-26.70) | <0.001 | 3.79 (2.05-7.00) | <0.001 |
| <b>Combined evaluation of hepatorenal function and nutritional status</b> |                   |        |                  |        |                    |        |                  |        |
| Normal (Normal hepatorenal function and well-nourished)                   | Referent          |        | Referent         |        | Referent           |        | Referent         |        |
| Mild (Hepatorenal dysfunction or malnutrition)                            | 2.88 (1.26-6.59)  | 0.012  | 2.15 (1.28-3.62) | 0.004  | 3.03 (1.32-6.97)   | 0.009  | 1.97 (1.16-3.35) | 0.013  |
| Severe (Hepatorenal dysfunction and malnutrition)                         | 8.19 (3.53-18.99) | <0.001 | 3.26 (1.87-5.68) | <0.001 | 8.48 (3.60-20.00)  | <0.001 | 2.83 (1.57-5.10) | <0.001 |

\*Adjusted for hypertension, dyslipidemia, prior stroke, significant tricuspid regurgitation, type of valvular surgery, and EuroSCORE II (P<0.05 on univariate analysis).

†Adjusted for hypertension, dyslipidemia, atrial fibrillation, heart failure, prior myocardial infarction, prior stroke, baseline medical therapy (angiotensin-converting enzyme inhibitors, warfarin), significant tricuspid regurgitation, pulmonary artery systolic pressure, type of valvular surgery, and EuroSCORE II (P<0.05 on univariate analysis).

‡ Adjusted for dyslipidemia, prior stroke, type of valvular surgery, and STS Score (P<0.05 on univariate analysis).

§Adjusted for dyslipidemia, prior myocardial infarction, prior stroke, atrial fibrillation, baseline medical therapy (angiotensin-converting enzyme inhibitors, warfarin), pulmonary artery systolic pressure, type of valvular surgery, and STS Score (P<0.05 on univariate analysis).

Abbreviations: CI, confidence interval; CONUT, Controlling Nutritional Status score; EuroSCORE II, European System for Cardiac Operative Risk Evaluation II; HR, hazard ratio; MELD-XI, Model for End-Stage Liver Disease excluding international normalized ratio; STS score, Society of Thoracic Surgeons Predicted Risk of Mortality Score.

Table S5A. Baseline characteristics of the study population according to hepatorenal function (MELD-XI)

| Characteristics                                               | Overall (n=909)  | Normal hepatorenal function<br>(MELD-XI $\leq$ 12.43) (n=693) | Hepatorenal dysfunction<br>(MELD-XI $>$ 12.43) (n=216) | P value |
|---------------------------------------------------------------|------------------|---------------------------------------------------------------|--------------------------------------------------------|---------|
| <b>Demographic and anthropometric characteristics</b>         |                  |                                                               |                                                        |         |
| Age, years                                                    | 63 (57-69)       | 62 (56-68)                                                    | 64 (59-70)                                             | <0.001  |
| Male                                                          | 431 (47.4)       | 295 (42.6)                                                    | 136 (63.0)                                             | <0.001  |
| Height, cm                                                    | 159 (153-166)    | 159 (153-165)                                                 | 160 (154-167)                                          | 0.158   |
| Weight, kg                                                    | 58 (50-67)       | 58 (51-67)                                                    | 58 (50-68)                                             | 0.857   |
| Body mass index, kg/m <sup>2</sup>                            | 23.0 (20.6-25.6) | 23.2 (20.7-25.7)                                              | 22.7 (19.9-25.4)                                       | 0.149   |
| NYHA Class III/IV                                             | 69 (7.6)         | 40 (5.8)                                                      | 29 (13.4)                                              | <0.001  |
| <b>Cardiovascular risk factors and cardiovascular disease</b> |                  |                                                               |                                                        |         |
| Hypertension                                                  | 290 (31.9)       | 209 (30.2)                                                    | 81 (37.5)                                              | 0.045   |
| Diabetes Mellitus                                             | 165 (18.2)       | 104 (15.0)                                                    | 64 (28.2)                                              | <0.001  |
| Dyslipidemia                                                  | 231 (25.4)       | 171 (24.7)                                                    | 60 (27.8)                                              | 0.371   |
| Smoking                                                       | 178 (19.6)       | 123 (17.7)                                                    | 55 (25.5)                                              | 0.014   |
| Prior myocardial infarction                                   | 37 (4.1)         | 24 (3.5)                                                      | 13 (6.0)                                               | 0.114   |
| Prior stroke                                                  | 82 (9.1)         | 54 (7.8)                                                      | 28 (13.1)                                              | 0.022   |
| Heart failure                                                 | 393 (43.2)       | 260 (37.5)                                                    | 133 (61.6)                                             | <0.001  |
| Atrial fibrillation                                           | 487 (53.6)       | 343 (49.5)                                                    | 144 (66.7)                                             | <0.001  |
| <b>Comorbidities</b>                                          |                  |                                                               |                                                        |         |

|                                                               |                  |                  |                  |        |
|---------------------------------------------------------------|------------------|------------------|------------------|--------|
| Chronic obstructive pulmonary disease                         | 52 (5.7)         | 39 (5.6)         | 13 (6.0)         | 0.867  |
| Cancer                                                        | 52 (5.7)         | 42 (6.1)         | 10 (4.6)         | 0.504  |
| <b>Laboratory examination</b>                                 |                  |                  |                  |        |
| Hemoglobin, g/dL                                              | 12.9 (11.6-14)   | 13.1 (12-14)     | 11.8 (10.2-13.5) | <0.001 |
| White cell count, x 10 <sup>9</sup> /L                        | 5.9 (4.9-7.0)    | 5.9 (4.9-6.8)    | 6.0 (4.8-7.6)    | 0.292  |
| Platelet count, x 10 <sup>9</sup> /L                          | 189 (157-227)    | 192 (165-228)    | 177 (134-222)    | <0.001 |
| Creatinine, mg/dL                                             | 0.92 (0.78-1.14) | 0.86 (0.75-1.01) | 1.37 (1.12-1.54) | <0.001 |
| eGFR, ml/min/1.73m <sup>2</sup>                               | 75.9 (60.9-90.1) | 81.5 (69.8-93.5) | 51.8 (38.0-62.4) | <0.001 |
| AST, U/L                                                      | 27 (22-35)       | 26 (22-33)       | 30 (25-40)       | <0.001 |
| ALT, U/L                                                      | 21 (16-29)       | 21 (16-29)       | 20 (16-27)       | 0.167  |
| ALP, U/L                                                      | 71 (58-90)       | 70 (56-85)       | 82 (63-113)      | <0.001 |
| Total bilirubin, mg/dL                                        | 0.75 (0.53-1.14) | 0.67 (0.51-0.94) | 1.5 (0.76-2.13)  | <0.001 |
| Total cholesterol, mg/dL                                      | 159 (134-188)    | 164 (139-193)    | 142 (120-165)    | <0.001 |
| Albumin, g/dL                                                 | 4.2 (4-4.4)      | 4.2 (4-4.4)      | 4 (3.7-4.3)      | <0.001 |
| <b>Valvular heart disease and echocardiographic variables</b> |                  |                  |                  |        |
| MS ≥ moderate                                                 | 229 (25.2)       | 182 (30.7)       | 47 (25.7)        | 0.196  |
| MR ≥ moderate                                                 | 411 (45.2)       | 294 (43.0)       | 17 (54.7)        | 0.003  |
| AS ≥ moderate                                                 | 322 (35.4)       | 254 (40.5)       | 68 (34.9)        | 0.179  |
| AR ≥ moderate                                                 | 231 (25.4)       | 183 (27.6)       | 48 (22.6)        | 0.179  |
| TR ≥ moderate                                                 | 365 (40.2)       | 242 (34.9)       | 123 (57.2)       | <0.001 |

|                                                   |               |               |               |        |
|---------------------------------------------------|---------------|---------------|---------------|--------|
| Chronic Rheumatic Heart Disease                   | 259 (28.5)    | 200 (28.9)    | 59 (27.3)     | 0.724  |
| LV Mass, g                                        | 224 (176-294) | 218 (170-283) | 248 (194-314) | <0.001 |
| LVEF, %                                           | 60 (55-60)    | 60 (55-60)    | 55 (50-60)    | <0.001 |
| Preserved, $\geq$ 50%                             | 763 (84.3)    | 599 (86.6)    | 164 (77.0)    | 0.001  |
| Mid-range, 40% - 49%                              | 57 (6.3)      | 45 (6.5)      | 12 (5.6)      | 0.748  |
| Reduced, <40%                                     | 55 (6.1)      | 29 (4.2)      | 26 (12.2)     | <0.001 |
| PASP, mmHg                                        | 40 (35-50)    | 40 (35-50)    | 45 (40-55)    | <0.001 |
| <b>Medications</b>                                |               |               |               |        |
| ACEI                                              | 286 (31.5)    | 204 (29.4)    | 82 (38.0)     | 0.019  |
| ARB                                               | 142 (15.6)    | 108 (15.6)    | 34 (15.7)     | 1.000  |
| Aldactone                                         | 117 (12.9)    | 67 (9.7)      | 50 (23.1)     | <0.001 |
| Beta blockers                                     | 374 (41.1)    | 264 (38.1)    | 110 (50.9)    | 0.001  |
| Calcium channel blockers                          | 185 (20.4)    | 143 (20.6)    | 42 (19.4)     | 0.772  |
| Digoxin                                           | 269 (29.6)    | 183 (26.4)    | 86 (39.8)     | <0.001 |
| Statin                                            | 373 (41)      | 274 (39.5)    | 99 (45.8)     | 0.113  |
| Warfarin                                          | 417 (45.9)    | 300 (43.3)    | 117 (54.2)    | 0.006  |
| <b>Cardiac surgery risk-stratification models</b> |               |               |               |        |
| EuroScore II                                      | 2.4 (1.3-4.5) | 2.1 (1.2-3.8) | 4.2 (2.5-7.8) | <0.001 |
| STS Score                                         | 1.5 (0.9-2.8) | 1.4 (0.8-2.3) | 2.5 (1.2-4.8) | <0.001 |
| <b>Valvular surgery details</b>                   |               |               |               |        |

|                          |            |            |            |        |
|--------------------------|------------|------------|------------|--------|
| Aortic valve replacement | 460 (50.7) | 363 (52.4) | 97 (45.1)  | 0.072  |
| Mitral valve procedure   | 554 (61)   | 410 (59.2) | 144 (66.7) | 0.055  |
| Mitral valve replacement | 295 (32.5) | 226 (32.6) | 69 (31.9)  | 0.868  |
| Mitral valve repair      | 259 (28.6) | 184 (26.6) | 75 (35.0)  | 0.019  |
| Tricuspid annuloplasty   | 319 (35.2) | 215 (31.0) | 104 (48.6) | <0.001 |
| Concomitant CABG         | 107 (11.8) | 71 (10.3)  | 36 (16.8)  | 0.011  |

Values are expressed as median (interquartile range) or number (percentage). P value by Mann-Whitney U test for non-normally distributed continuous variables; P value by  $\chi^2$  test for categorical variables.

Abbreviations: ACEI, angiotensin-converting enzyme inhibitors; ARB, angiotensin II receptor blockers; ALP, alkaline phosphatase; ALT, alanine aminotransaminase; AR, aortic regurgitation; AS, aortic stenosis; AST, aspartate aminotransferase; CABG, coronary artery bypass grafting; eGFR, estimated glomerular filtration rate; EuroSCORE II, European System for Cardiac Operative Risk Evaluation II; LVEF, left ventricular ejection fraction; PASP, pulmonary artery systolic pressure; MR, mitral regurgitation; MS, mitral stenosis; NYHA, New York Heart Association; STS score, Society of Thoracic Surgeons Predicted Risk of Mortality Score; TR, tricuspid regurgitation.



Table S5B. Univariate and multivariate logistic regression models showing predictors of baseline hepatorenal dysfunction (MELD-XI) in patients undergoing valvular surgery

|                                                               | Univariate analysis |         | Multivariate analysis<br>(EuroSCORE II model) |         | Multivariate analysis<br>(STS Score model) |         |
|---------------------------------------------------------------|---------------------|---------|-----------------------------------------------|---------|--------------------------------------------|---------|
|                                                               | OR (95% CI)         | P value | OR (95% CI)                                   | P value | OR (95% CI)                                | P value |
| <b>Demographic and anthropometric characteristics</b>         |                     |         |                                               |         |                                            |         |
| Age, years                                                    | 1.03 (1.01-1.05)    | <0.001  |                                               |         |                                            |         |
| Male                                                          | 2.29 (1.68-3.15)    | <0.001  |                                               |         |                                            |         |
| Body mass index, kg/m <sup>2</sup>                            | 0.97 (0.93-1.01)    | 0.166   |                                               |         |                                            |         |
| NYHA functional class<br>III/IV                               | 2.53 (1.52-4.18)    | <0.001  |                                               |         |                                            |         |
| <b>Cardiovascular risk factors and cardiovascular disease</b> |                     |         |                                               |         |                                            |         |
| Hypertension                                                  | 1.39 (1.01-1.91)    | 0.044   | 1.10 (0.69-1.75)                              | 0.674   |                                            |         |
| Diabetes Mellitus                                             | 2.23 (1.55-3.20)    | <0.001  |                                               |         |                                            |         |
| Smoking                                                       | 1.58 (1.10-2.27)    | 0.013   | 2.12 (1.26-3.53)                              | 0.004   | 2.56 (1.50-4.38)                           | <0.001  |
| Dyslipidemia                                                  | 1.17 (0.83-1.65)    | 0.361   |                                               |         |                                            |         |
| Prior myocardial<br>infarction                                | 1.79 (0.87-3.52)    | 0.101   | 0.98 (0.33-2.75)                              | 0.973   | 0.80 (0.27-2.28)                           | 0.689   |
| Prior stroke                                                  | 1.77 (1.08-2.85)    | 0.021   | 1.40 (0.74-2.61)                              | 0.297   | 1.33 (0.66-2.62)                           | 0.422   |
| Atrial fibrillation                                           | 2.04 (1.49-2.82)    | <0.001  | 1.27 (0.78-2.09)                              | 0.342   | 1.31 (0.81-2.15)                           | 0.268   |
| Heart failure                                                 | 2.67 (1.95-3.66)    | <0.001  | 1.63 (1.06-2.52)                              | 0.026   |                                            |         |

| <b>Valvular heart disease and echocardiographic variables</b> |                     |        |                     |        |                     |        |
|---------------------------------------------------------------|---------------------|--------|---------------------|--------|---------------------|--------|
| MS ≥ moderate                                                 | 0.78 (0.53-1.13)    | 0.195  |                     |        |                     |        |
| MR ≥ moderate                                                 | 1.60 (1.18-2.18)    | 0.003  | 1.97 (1.25-3.13)    | 0.004  |                     |        |
| AS ≥ moderate                                                 | 0.78 (0.56-1.10)    | 0.159  |                     |        |                     |        |
| AR ≥ moderate                                                 | 0.77 (0.53-1.10)    | 0.155  |                     |        |                     |        |
| TR ≥ moderate                                                 | 2.49 (1.83-3.41)    | <0.001 | 1.19 (0.72-1.95)    | 0.503  |                     |        |
| LV Mass, g                                                    | 1.004 (1.002-1.005) | <0.001 | 1.004 (1.001-1.006) | 0.002  | 1.007 (1.004-1.009) | <0.001 |
| LVEF, %                                                       | 0.96 (0.95-0.98)    | <0.001 |                     |        |                     |        |
| PASP, mmHg                                                    | 1.03 (1.02-1.04)    | <0.001 | 1.01 (1.00-1.03)    | 0.071  | 1.02 (1.01-1.03)    | 0.007  |
| <b>Cardiac surgery risk-stratification models</b>             |                     |        |                     |        |                     |        |
| EuroSCORE II                                                  | 1.14 (1.10-1.19)    | <0.001 | 1.11 (1.06-1.18)    | <0.001 |                     |        |
| STS Score                                                     | 1.39 (1.28-1.50)    | <0.001 |                     |        | 1.26 (1.15-1.40)    | <0.001 |
| <b>Nutritional status</b>                                     |                     |        |                     |        |                     |        |
| CONUT, continuous                                             | 1.76 (1.58-1.97)    | <0.001 | 1.62 (1.41-1.88)    | <0.001 | 1.64 (1.42-1.91)    | <0.001 |

Abbreviations: AR, aortic regurgitation; AS, aortic stenosis; CI, confidence interval; CONUT, Controlling Nutritional Status score; EuroSCORE II, European System for Cardiac Operative Risk Evaluation II; LV, left ventricle; LVEF, left ventricular ejection fraction; PASP, pulmonary artery systolic pressure; MELD-XI, Model for End-Stage Liver Disease excluding international normalized ratio; MR, mitral regurgitation; MS, mitral stenosis; NYHA, New York Heart Association; OR, odds ratio; STS score, Society of Thoracic Surgeons Predicted Risk of Mortality Score; TR, tricuspid regurgitation.

Table S5C. Cox proportional hazards analysis of baseline hepatorenal function (MELD-XI) for predicting all-cause mortality and adverse events

|                                          | <b>Multivariate analysis</b> |         |                  |         |                        |         |                  |         |
|------------------------------------------|------------------------------|---------|------------------|---------|------------------------|---------|------------------|---------|
|                                          | <b>EuroSCORE II model</b>    |         |                  |         | <b>STS Score model</b> |         |                  |         |
|                                          | All-cause mortality*         |         | Adverse events†  |         | All-cause mortality‡   |         | Adverse events§  |         |
|                                          | HR (95% CI)                  | P value | HR (95% CI)      | P value | HR (95% CI)            | P value | HR (95% CI)      | P value |
| <b>Hepatorenal function</b>              |                              |         |                  |         |                        |         |                  |         |
| MELD-XI, continuous                      | 1.14 (1.10-1.17)             | <0.001  | 1.09 (1.05-1.12) | <0.001  | 1.11 (1.07-1.16)       | <0.001  | 1.05 (1.01-1.09) | 0.010   |
| MELD-XI, categorical                     |                              |         |                  |         |                        |         |                  |         |
| Normal hepatorenal function              | 1.00                         |         | 1.00             |         | 1.00                   |         | 1.00             |         |
| Hepatorenal dysfunction (MELD-XI >12.43) | 3.35 (2.20-5.12)             | <0.001  | 1.88 (1.32-2.67) | <0.001  | 2.94 (1.84-4.70)       | <0.001  | 1.70 (1.17-2.48) | 0.006   |

\*Adjusted for hypertension, dyslipidemia, prior stroke, baseline warfarin therapy, type of valvular lesion, type of valvular surgery, EuroSCORE II (P<0.05 on univariate analysis).

†Adjusted for hypertension, dyslipidemia, prior stroke, atrial fibrillation, heart failure, baseline medical therapy (angiotensin-converting enzyme inhibitors, warfarin), chronic rheumatic heart disease, type of valvular lesion, tricuspid annuloplasty, pulmonary artery systolic pressure and EuroSCORE II (P<0.05 on univariate analysis).

‡Adjusted for dyslipidemia, prior stroke, baseline warfarin therapy, type of valvular surgery, and STS Score (P<0.05 on univariate analysis).

§Adjusted for dyslipidemia, prior stroke, atrial fibrillation, baseline medical therapy (angiotensin-converting enzyme inhibitors, warfarin), chronic rheumatic heart disease, tricuspid annuloplasty, pulmonary artery systolic pressure, and STS Score (P<0.05 on univariate analysis).

Abbreviations: CI, confidence interval; EuroSCORE II, European System for Cardiac Operative Risk Evaluation II; HR, hazard ratio; MELD-XI, Model for End-Stage Liver Disease excluding international normalized ratio; STS score, Society of Thoracic Surgeons Predicted Risk of Mortality Score.

Table S5D. Competing Risk Analysis of baseline hepatorenal function (MELD-XI) for predicting cardiovascular death and heart failure hospitalization

|                                          | <b>Unadjusted</b> | <b>EuroSCORE II model*</b> | <b>STS Score model†</b> |
|------------------------------------------|-------------------|----------------------------|-------------------------|
|                                          | SHR (95% CI)      | SHR (95% CI)               | SHR (95% CI)            |
| <b>Hepatorenal function</b>              |                   |                            |                         |
| MELD-XI, continuous                      | 1.08 (1.06-1.11)  | 1.06 (1.02-1.10)           | 1.06 (1.02-1.10)        |
| MELD-XI, categorical                     |                   |                            |                         |
| Normal hepatorenal function              | 1.00              | 1.00                       | 1.00                    |
| Hepatorenal dysfunction (MELD-XI >12.43) | 2.78 (2.02-3.82)  | 1.65 (1.11-2.45)           | 1.71 (1.12-2.61)        |

\*Adjusted for atrial fibrillation, heart failure, significant tricuspid regurgitation, pulmonary artery systolic pressure, and EuroSCORE II (P<0.05 on univariate analysis).

†Adjusted for atrial fibrillation, heart failure, pulmonary artery systolic pressure, and STS Score (P<0.05 on univariate analysis).

Abbreviations: CI, confidence interval; CONUT, EuroSCORE II, European System for Cardiac Operative Risk Evaluation II; MELD-XI, Model for End-Stage Liver Disease excluding international normalized ratio; SHR, subdistribution hazard ratio; STS score, Society of Thoracic Surgeons Predicted Risk of Mortality Score.

Table S5E. Competing Risk Analysis of baseline hepatorenal function (MELD-XI) for predicting cardiovascular death

|                                          | <b>Unadjusted</b> | <b>EuroSCORE II model*</b> | <b>STS Score model†</b> |
|------------------------------------------|-------------------|----------------------------|-------------------------|
|                                          | SHR (95% CI)      | SHR (95% CI)               | SHR (95% CI)            |
| <b>Hepatorenal function</b>              |                   |                            |                         |
| MELD-XI, continuous                      | 1.12 (1.09-1.16)  | 1.10 (1.06-1.14)           | 1.08 (1.03-1.14)        |
| MELD-XI, categorical                     |                   |                            |                         |
| Normal hepatorenal function              | 1.00              | 1.00                       | 1.00                    |
| Hepatorenal dysfunction (MELD-XI >12.43) | 4.53 (2.64-7.76)  | 3.23 (1.83-5.70)           | 3.18 (1.71-5.92)        |

\*Adjusted for hypertension, significant tricuspid regurgitation, and EuroSCORE II (P<0.05 on univariate analysis).

†Adjusted for hypertension and STS Score (P<0.05 on univariate analysis).

Abbreviations: CI, confidence interval; EuroSCORE II, European System for Cardiac Operative Risk Evaluation II; MELD-XI, Model for End-Stage Liver Disease excluding international normalized ratio; SHR, subdistribution hazard ratio; STS score, Society of Thoracic Surgeons Predicted Risk of Mortality Score.

Table S6A. Baseline characteristics of the study population according to nutritional status (CONUT)

| Characteristics                                               | Overall (n=909) | Normal nutritional status (n=355) | Mild malnutrition (n=480) | Moderate to severe malnutrition (n=74) | P value |
|---------------------------------------------------------------|-----------------|-----------------------------------|---------------------------|----------------------------------------|---------|
| <b>Demographic and anthropometric characteristics</b>         |                 |                                   |                           |                                        |         |
| Age, years                                                    | 63 (57-69)      | 60 (54-66)†‡                      | 65 (59-70)*               | 64 (57-71)*                            | <0.001  |
| Male                                                          | 431 (47.4)      | 161 (45.4)                        | 232 (48.3)                | 38 (51.4)                              | 0.54    |
| Height, cm                                                    | 159 (153-166)   | 160 (155-167)                     | 159 (153-165)             | 158 (153-165)                          | 0.29    |
| Weight, kg                                                    | 58 (50-67)      | 61 (53-69)†‡                      | 57 (50-66)*               | 53 (46-63)*                            | <0.001  |
| Body mass index, kg/m <sup>2</sup>                            | 23 (20.6-25.6)  | 24 (21-26)†‡                      | 23 (20-26)*               | 21 (19-25)*                            | <0.001  |
| NYHA Class III/IV                                             | 69 (7.6)        | 20 (5.6)‡                         | 38 (7.9)                  | 11 (14.9)*                             | 0.022   |
| <b>Cardiovascular risk factors and cardiovascular disease</b> |                 |                                   |                           |                                        |         |
| Hypertension                                                  | 290 (31.9)      | 93 (26.2)†                        | 175 (36.5)*               | 22 (29.7)                              | 0.01    |
| Diabetes Mellitus                                             | 165 (18.2)      | 33 (9.3)†‡                        | 110 (22.9)*               | 22 (29.7)*                             | <0.001  |
| Dyslipidemia                                                  | 231 (25.4)      | 77 (21.7)                         | 136 (28.3)                | 18 (24.3)                              | 0.09    |
| Smoking                                                       | 178 (19.6)      | 78 (22.0)                         | 86 (17.9)                 | 14 (18.9)                              | 0.34    |
| Prior myocardial infarction                                   | 37 (4.1)        | 9 (2.5)                           | 25 (5.2)                  | 3 (4.1)                                | 0.16    |
| Prior stroke                                                  | 82 (9.1)        | 20 (5.6)‡                         | 47 (9.9)‡                 | 15 (20.3)*†                            | <0.001  |
| Heart failure                                                 | 393 (43.2)      | 139 (39.2)‡                       | 207 (43.1)                | 47 (63.5)*                             | <0.001  |
| Atrial fibrillation                                           | 487 (53.6)      | 156 (43.9)†‡                      | 280 (58.3)*               | 51 (68.9)*                             | <0.001  |
| <b>Comorbidities</b>                                          |                 |                                   |                           |                                        |         |

|                                                               |                  |                                |                                |                                |        |
|---------------------------------------------------------------|------------------|--------------------------------|--------------------------------|--------------------------------|--------|
| Chronic obstructive pulmonary disease                         | 52 (5.7)         | 15 (4.2)                       | 32 (6.7)                       | 5 (6.8)                        | 0.30   |
| Cancer                                                        | 52 (5.7)         | 22 (6.2)                       | 28 (5.8)                       | 2 (2.7)                        | 0.49   |
| <b>Laboratory examination</b>                                 |                  |                                |                                |                                |        |
| Hemoglobin, g/dL                                              | 12.9 (11.6-14)   | 13.4 (12.5-14.5) <sup>†‡</sup> | 12.7 (11.5-13.7) <sup>*‡</sup> | 10.6 (9.6-11.8) <sup>*†</sup>  | <0.001 |
| White cell count, x 10 <sup>9</sup> /L                        | 5.9 (4.9-7.0)    | 6.1 (5.3-7.0) <sup>†‡</sup>    | 5.8 (4.7-7.0) <sup>*‡</sup>    | 4.7 (3.8-6.3) <sup>*†</sup>    | <0.001 |
| Platelet count, x 10 <sup>9</sup> /L                          | 189 (157-227)    | 201 (174-236) <sup>†‡</sup>    | 182 (147-219) <sup>*‡</sup>    | 168 (114-203) <sup>*†</sup>    | <0.001 |
| Creatinine, mg/dL                                             | 0.9 (0.8-1.1)    | 0.9 (0.8-1.0) <sup>†‡</sup>    | 0.9 (0.8-1.2) <sup>*‡</sup>    | 1.2 (0.9-1.5) <sup>*†</sup>    | <0.001 |
| eGFR, ml/min/1.73m <sup>2</sup>                               | 75.9 (60.9-90.1) | 80.8 (69.2-94.0) <sup>†‡</sup> | 74.0 (59.3-89.2) <sup>*‡</sup> | 60.3 (38.0-75.0) <sup>*†</sup> | <0.001 |
| AST, U/L                                                      | 27 (22-35)       | 26 (22-32) <sup>†‡</sup>       | 28 (23-36) <sup>*</sup>        | 29 (24-43) <sup>*</sup>        | <0.001 |
| ALT, U/L                                                      | 21 (16-29)       | 22 (17-30)                     | 20 (16-28)                     | 19.5 (14-27)                   | 0.03   |
| ALP, U/L                                                      | 71 (58-90)       | 67 (55-84) <sup>†‡</sup>       | 73 (58-90.2) <sup>*‡</sup>     | 98 (68.2-134) <sup>*†</sup>    | <0.001 |
| Total bilirubin, mg/dL                                        | 0.7 (0.5-1.1)    | 0.6 (0.5-0.9) <sup>†‡</sup>    | 0.8 (0.6-1.2) <sup>*‡</sup>    | 1.2 (0.9-2.1) <sup>*†</sup>    | <0.001 |
| Total cholesterol, mg/dL                                      | 159 (134-188)    | 189 (166-210) <sup>†‡</sup>    | 143 (125-164) <sup>*‡</sup>    | 127 (113-139) <sup>*†</sup>    | <0.001 |
| Albumin, g/dL                                                 | 4.2 (4-4.4)      | 4.3 (4-4.5) <sup>†‡</sup>      | 4.2 (4-4.4) <sup>*‡</sup>      | 3.7 (3.3-4) <sup>*†</sup>      | <0.001 |
| <b>Valvular heart disease and echocardiographic variables</b> |                  |                                |                                |                                |        |
| MS ≥ moderate                                                 | 229 (25.2)       | 89 (28.8)                      | 129 (31.9)                     | 11 (17.7)                      | 0.07   |
| MR ≥ moderate                                                 | 411 (45.2)       | 174 (49.6)                     | 207 (43.7)                     | 30 (41.1)                      | 0.17   |
| AS ≥ moderate                                                 | 322 (35.4)       | 121 (38.1)                     | 180 (41.2)                     | 21 (31.3)                      | 0.27   |
| AR ≥ moderate                                                 | 231 (25.4)       | 96 (28.7)                      | 122 (26.0)                     | 13 (18.3)                      | 0.19   |
| TR ≥ moderate                                                 | 365 (40.2)       | 91 (25.6) <sup>†‡</sup>        | 222 (46.3) <sup>*‡</sup>       | 52 (70.3) <sup>*†</sup>        | <0.001 |



|                                                   |               |                 |                 |                 |        |
|---------------------------------------------------|---------------|-----------------|-----------------|-----------------|--------|
| Chronic Rheumatic Heart Disease                   | 259 (28.5)    | 91 (25.6)       | 151 (31.5)      | 17 (23.0)       | 0.14   |
| LV Mass, g                                        | 224 (176-294) | 224 (175-291)   | 225 (175-290)   | 224 (194-297)   | 0.38   |
| LVEF, %                                           | 60 (55-60)    | 60 (55-60)‡     | 60 (55-60)      | 57.5 (46.2-60)* | 0.01   |
| Preserved, ≥50%                                   | 763 (84.3)    | 305 (86.4)‡     | 403 (84.3)      | 55 (74.3)*      | 0.03   |
| Mid-range, 40% - 49%                              | 57 (6.3)      | 20 (5.7)        | 33 (6.9)        | 4 (5.4)         | 0.73   |
| Reduced, <40%                                     | 55 (6.1)      | 17 (4.8)‡       | 27 (5.6)‡       | 11 (14.9)*      | 0.004  |
| PASP, mmHg                                        | 40 (35-50)    | 40 (30-46)†‡    | 45 (35-53)*     | 45 (40-55)*     | <0.001 |
| <b>Medications</b>                                |               |                 |                 |                 |        |
| ACEI                                              | 286 (31.5)    | 97 (27.3)       | 164 (34.2)      | 25 (33.8)       | 0.10   |
| ARB                                               | 142 (15.6)    | 54 (15.2)       | 80 (16.7)       | 8 (10.8)        | 0.42   |
| Aldactone                                         | 117 (12.9)    | 24 (6.8)†‡      | 68 (14.2)*‡     | 25 (33.8)*†     | <0.001 |
| Beta blockers                                     | 374 (41.1)    | 139 (39.2)      | 203 (42.3)      | 32 (43.2)       | 0.61   |
| Calcium channel blockers                          | 185 (20.4)    | 68 (19.2)       | 105 (21.9)      | 12 (16.2)       | 0.41   |
| Digoxin                                           | 269 (29.6)    | 90 (25.4)‡      | 146 (30.4)‡     | 33 (44.6)*†     | 0.004  |
| Statin                                            | 373 (41)      | 103 (29.0)†     | 245 (51.0)*‡    | 25 (33.8)†      | <0.001 |
| Warfarin                                          | 417 (45.9)    | 128 (36.1)†‡    | 239 (49.8)*‡    | 50 (67.6)*†     | <0.001 |
| <b>Cardiac surgery risk-stratification models</b> |               |                 |                 |                 |        |
| EuroScore II                                      | 2.4 (1.3-4.5) | 1.8 (1.0-3.0)†‡ | 2.8 (1.7-5.5)*‡ | 5.9 (3.2-9.5)*† | <0.001 |
| STS Score                                         | 1.5 (0.9-2.8) | 1.1 (0.6-1.9)†‡ | 1.8 (1.1-3.2)*‡ | 3.3 (1.7-5.5)*† | <0.001 |
| <b>Valvular surgery details</b>                   |               |                 |                 |                 |        |

|                          |            |             |              |             |        |
|--------------------------|------------|-------------|--------------|-------------|--------|
| Aortic valve replacement | 460 (50.7) | 179 (50.4)  | 252 (52.5)   | 29 (39.7)   | 0.13   |
| Mitral valve procedure   | 554 (61)   | 219 (61.9)  | 292 (60.8)   | 43 (58.1)   | 0.83   |
| Mitral valve replacement | 295 (32.5) | 106 (29.9)  | 168 (35.0)   | 21 (28.4)   | 0.22   |
| Mitral valve repair      | 259 (28.6) | 113 (31.9)  | 124 (25.9)   | 22 (29.7)   | 0.16   |
| Tricuspid annuloplasty   | 319 (35.2) | 90 (25.4)†‡ | 189 (39.5)*‡ | 40 (54.8)*† | <0.001 |
| Concomitant CABG         | 107 (11.8) | 24 (6.8)†‡  | 70 (14.6)*   | 13 (17.8)*  | 0.001  |

Values are expressed as median (interquartile range) or number (percentage). P value by Kruskal-Wallis H test for non-normally distributed continuous variables. P value by  $\chi^2$  test for categorical variables (Bonferroni correction: \*P<0.05 vs normal nutritional status, †P<0.05 vs mild malnutrition [CONUT score of 2 to 4], ‡P<0.05 vs moderate to severe malnutrition [CONUT score of 5-12]).

Abbreviations: ACEI, angiotensin-converting enzyme inhibitors; ARB, angiotensin II receptor blockers; ALP, alkaline phosphatase; ALT, alanine aminotransaminase; AR, aortic regurgitation; AS, aortic stenosis; AST, aspartate aminotransferase; CABG, coronary artery bypass grafting; eGFR, estimated glomerular filtration rate; EuroSCORE II, European System for Cardiac Operative Risk Evaluation II; LVEF; left ventricular ejection fraction; PASP, pulmonary artery systolic pressure; MR, mitral regurgitation; MS, mitral stenosis; NYHA, New York Heart Association; STS score, Society of Thoracic Surgeons Predicted Risk of Mortality Score; TR, tricuspid regurgitation.

Table S6B. Univariate and multivariate logistic regression models showing predictors of baseline malnutrition (CONUT) in patients undergoing valvular surgery

|                                                               | Univariate analysis |         | Multivariate analysis<br>(EuroSCORE II model) |         | Multivariate analysis<br>(STS Score model) |         |
|---------------------------------------------------------------|---------------------|---------|-----------------------------------------------|---------|--------------------------------------------|---------|
|                                                               | OR (95% CI)         | P value | OR (95% CI)                                   | P value | OR (95% CI)                                | P value |
| <b>Demographic and anthropometric characteristics</b>         |                     |         |                                               |         |                                            |         |
| Age, years                                                    | 1.06 (1.04-1.07)    | <0.001  |                                               |         |                                            |         |
| Male                                                          | 1.15 (0.88-1.50)    | 0.32    |                                               |         |                                            |         |
| Body mass index, kg/m <sup>2</sup>                            | 0.94 (0.91-0.98)    | 0.002   | 0.93 (0.89-0.98)                              | 0.010   | 0.94 (0.89-0.99)                           | 0.021   |
| NYHA functional class<br>III/IV                               | 1.63 (0.96-2.84)    | 0.08    |                                               |         |                                            |         |
| <b>Cardiovascular risk factors and cardiovascular disease</b> |                     |         |                                               |         |                                            |         |
| Hypertension                                                  | 1.55 (1.16-2.09)    | 0.003   | 1.92 (1.20-3.13)                              | 0.007   |                                            |         |
| Diabetes Mellitus                                             | 3.05 (2.05-4.65)    | <0.001  |                                               |         |                                            |         |
| Smoking                                                       | 0.78 (0.56-1.09)    | 0.147   |                                               |         |                                            |         |
| Dyslipidemia                                                  | 1.39 (1.02-1.91)    | 0.040   | 1.00 (0.62-1.62)                              | 0.994   | 1.13 (0.71-1.81)                           | 0.609   |
| Prior myocardial<br>infarction                                | 2.05 (0.99-4.65)    | 0.066   |                                               |         |                                            |         |
| Prior stroke                                                  | 2.13 (1.28-3.67)    | 0.005   | 1.70 (0.86-3.53)                              | 0.137   | 1.77 (0.85-3.89)                           | 0.138   |
| Atrial fibrillation                                           | 1.89 (1.45-2.48)    | <0.001  | 0.95 (0.61-1.48)                              | 0.827   | 0.93 (0.61-1.40)                           | 0.726   |
| Heart failure                                                 | 1.32 (1.00-1.73)    | 0.047   | 0.77 (0.52-1.13)                              | 0.178   |                                            |         |

| <b>Valvular heart disease and echocardiographic variables</b> |                     |        |                  |        |                  |        |
|---------------------------------------------------------------|---------------------|--------|------------------|--------|------------------|--------|
| MS ≥ moderate                                                 | 1.06 (0.77-1.45)    | 0.725  |                  |        |                  |        |
| MR ≥ moderate                                                 | 0.78 (0.59-1.02)    | 0.067  |                  |        |                  |        |
| AS ≥ moderate                                                 | 1.08 (0.81-1.44)    | 0.601  |                  |        |                  |        |
| AR ≥ moderate                                                 | 0.83 (0.61-1.13)    | 0.233  |                  |        |                  |        |
| TR ≥ moderate                                                 | 2.85 (2.14-3.82)    | <0.001 | 2.02 (1.30-3.16) | 0.002  |                  |        |
| LV Mass, g                                                    | 1.001 (0.999-1.002) | 0.449  |                  |        |                  |        |
| LVEF, %                                                       | 0.98 (0.97-0.99)    | 0.008  |                  |        |                  |        |
| PASP, mmHg                                                    | 1.03 (1.02-1.04)    | <0.001 | 1.01 (1.00-1.02) | 0.188  | 1.01 (1.00-1.03) | 0.036  |
| <b>Cardiac surgery risk-stratification models</b>             |                     |        |                  |        |                  |        |
| EuroSCORE II                                                  | 1.14 (1.10-1.19)    | <0.001 | 1.15 (1.07-1.25) | <0.001 |                  |        |
| STS Score                                                     | 1.39 (1.28-1.50)    | <0.001 |                  |        | 1.34 (1.18-1.56) | <0.001 |
| <b>Hepatorenal dysfunction</b>                                |                     |        |                  |        |                  |        |
| eGFR, ml/min/1.73m <sup>2</sup>                               | 0.98 (0.97-0.98)    | <0.001 |                  |        |                  |        |
| MELD-XI, continuous                                           | 1.29 (1.21-1.39)    | <0.001 | 1.23 (1.13-1.37) | <0.001 | 1.26 (1.14-1.40) | <0.001 |

Abbreviations: AR, aortic regurgitation; AS, aortic stenosis; CI, confidence interval; CONUT, Controlling Nutritional Status score; EuroSCORE II, European System for Cardiac Operative Risk Evaluation II; LV, left ventricle; LVEF, left ventricular ejection fraction; PASP, pulmonary artery systolic pressure; MELD-XI, Model for End-Stage Liver Disease excluding international normalized ratio; MR, mitral regurgitation; MS, mitral stenosis; NYHA, New York Heart Association; OR, odds ratio; STS score, Society of Thoracic Surgeons Predicted Risk of Mortality Score; TR, tricuspid regurgitation.

Table S6C. Cox proportional hazards analysis of baseline nutritional status (CONUT) for predicting all-cause mortality and adverse events

|                                 | <b>Multivariate analysis</b> |         |                  |         |                        |         |                  |         |
|---------------------------------|------------------------------|---------|------------------|---------|------------------------|---------|------------------|---------|
|                                 | <b>EuroSCORE II model</b>    |         |                  |         | <b>STS Score model</b> |         |                  |         |
|                                 | All-cause mortality*         |         | Adverse events†  |         | All-cause mortality‡   |         | Adverse events§  |         |
|                                 | HR (95% CI)                  | P value | HR (95% CI)      | P value | HR (95% CI)            | P value | HR (95% CI)      | P value |
| <b>Nutritional status</b>       |                              |         |                  |         |                        |         |                  |         |
| CONUT, continuous               | 1.41 (1.25-1.58)             | <0.001  | 1.28 (1.16-1.42) | <0.001  | 1.43 (1.27-1.62)       | <0.001  | 1.30 (1.17-1.45) | <0.001  |
| CONUT, categorical              |                              |         |                  |         |                        |         |                  |         |
| Normal nutrition                | 1.00                         |         | 1.00             |         | 1.00                   |         | 1.00             |         |
| Mild malnutrition               | 3.81 (1.87-7.75)             | <0.001  | 2.06 (1.29-3.28) | 0.002   | 3.88 (1.89-7.93)       | <0.001  | 1.99 (1.24-3.20) | 0.004   |
| Moderate to severe malnutrition | 7.97 (3.58-17.77)            | <0.001  | 4.17 (2.35-7.41) | <0.001  | 7.95 (3.42-18.48)      | <0.001  | 3.89 (2.14-7.10) | <0.001  |

\*Adjusted for hypertension, dyslipidemia, prior stroke, baseline warfarin therapy, type of valvular lesion, type of valvular surgery, EuroSCORE II (P<0.05 on univariate analysis).

†Adjusted for hypertension, dyslipidemia, prior stroke, atrial fibrillation, heart failure, baseline medical therapy (angiotensin-converting enzyme inhibitors, warfarin), chronic rheumatic heart disease, type of valvular lesion, tricuspid annuloplasty, pulmonary artery systolic pressure and EuroSCORE II (P<0.05 on univariate analysis).

‡Adjusted for dyslipidemia, prior stroke, baseline warfarin therapy, type of valvular surgery, and STS Score (P<0.05 on univariate analysis).

§Adjusted for dyslipidemia, prior stroke, atrial fibrillation, baseline medical therapy (angiotensin-converting enzyme inhibitors, warfarin), chronic rheumatic heart disease, tricuspid annuloplasty, pulmonary artery systolic pressure, and STS Score (P<0.05 on univariate analysis).

Abbreviations: CI, confidence interval; CONUT, Controlling Nutritional Status score; EuroSCORE II, European System for Cardiac Operative Risk Evaluation II; HR, hazard ratio; STS score, Society of Thoracic Surgeons Predicted Risk of Mortality Score.

Table S6D. Competing Risk Analysis of baseline nutritional status (CONUT) for predicting heart failure hospitalization

|                                 | <b>Unadjusted</b> | <b>EuroSCORE II model*</b> | <b>STS Score model†</b> |
|---------------------------------|-------------------|----------------------------|-------------------------|
|                                 | SHR (95% CI)      | SHR (95% CI)               | SHR (95% CI)            |
| <b>Nutritional Status</b>       |                   |                            |                         |
| CONUT, continuous               | 1.44 (1.32-1.56)  | 1.29 (1.16-1.42)           | 1.26 (1.12-1.41)        |
| CONUT, categorical              |                   |                            |                         |
| Normal nutrition                | 1.00              | 1.00                       | 1.00                    |
| Mild malnutrition               | 2.46 (1.53-3.95)  | 2.09 (1.30-3.37)           | 1.96 (1.18-3.24)        |
| Moderate to severe malnutrition | 5.92 (3.39-10.36) | 4.00 (2.23-7.17)           | 3.25 (1.64-6.43)        |

\*Adjusted for atrial fibrillation, heart failure, significant tricuspid regurgitation, pulmonary artery systolic pressure, and EuroSCORE II (P<0.05 on univariate analysis).

†Adjusted for atrial fibrillation, heart failure, pulmonary artery systolic pressure, and STS Score (P<0.05 on univariate analysis).

Abbreviations: CI, confidence interval; CONUT, Controlling Nutritional Status score; EuroSCORE II, European System for Cardiac Operative Risk Evaluation II; MELD-XI, Model for End-Stage Liver Disease excluding international normalized ratio; SHR, subdistribution hazard ratio; STS score, Society of Thoracic Surgeons Predicted Risk of Mortality Score.

Table S6E. Competing Risk Analysis of baseline nutritional status (CONUT) for predicting cardiovascular death

|                                 | <b>Unadjusted</b> | <b>EuroSCORE II model*</b> | <b>STS Score model†</b> |
|---------------------------------|-------------------|----------------------------|-------------------------|
|                                 | SHR (95% CI)      | SHR (95% CI)               | SHR (95% CI)            |
| <b>Nutritional Status</b>       |                   |                            |                         |
| CONUT, continuous               | 1.62 (1.44-1.83)  | 1.53 (1.35-1.74)           | 1.61 (1.41-1.84)        |
| CONUT, categorical              |                   |                            |                         |
| Normal nutrition                | 1.00              | 1.00                       | 1.00                    |
| Mild malnutrition               | 5.21 (2.03-13.4)  | 3.94 (1.55-10.02)          | 3.97 (1.50-10.49)       |
| Moderate to severe malnutrition | 16.42 (5.98-45.1) | 10.31 (3.73-28.51)         | 11.21 (3.78-33.26)      |

\*Adjusted for hypertension, significant tricuspid regurgitation, and EuroSCORE II (P<0.05 on univariate analysis).

†Adjusted for hypertension and STS Score (P<0.05 on univariate analysis).

Abbreviations: CI, confidence interval; CONUT, Controlling Nutritional Status score; EuroSCORE II, European System for Cardiac Operative Risk Evaluation II; MELD-XI, Model for End-Stage Liver Disease excluding international normalized ratio; SHR, subdistribution hazard ratio; STS score, Society of Thoracic Surgeons Predicted Risk of Mortality Score.



Table S7. Calibration of the Cox proportional hazards models for predicting all-cause mortality and adverse events

| Outcome             | EuroSCORE II model |         | STS Score model |         |
|---------------------|--------------------|---------|-----------------|---------|
|                     | Wald Chi-square    | P value | Wald Chi-square | P value |
| All-cause mortality | 2.22               | 0.137   | 1.93            | 0.165   |
| Adverse events      | 4.90               | 0.180   | 1.36            | 0.506   |

Abbreviations: EuroSCORE II, European System for Cardiac Operative Risk Evaluation II; STS score, Society of Thoracic Surgeons Predicted Risk of Mortality Score.

Table S8. Incremental prognostic and discriminatory value of adding serum albumin to EuroSCORE II and STS Score

| <b>Models</b>          | <b>C-statistics</b> | <b>P value</b> | <b>cNRI</b> | <b>P value</b> | <b>IDI</b> | <b>P value</b> |
|------------------------|---------------------|----------------|-------------|----------------|------------|----------------|
| <b>Death</b>           |                     |                |             |                |            |                |
| EuroSCORE II           | 0.73                | <0.001         | Ref         |                | Ref        |                |
| EuroSCORE II + Albumin | 0.72                | 0.602          | 0.21        | 0.053          | 0.01       | 0.088          |
| STS Score              | 0.72                | <0.001         | Ref         |                | Ref        |                |
| STS Score + Albumin    | 0.74                | 0.209          | 0.25        | 0.027          | 0.01       | 0.032          |

Abbreviations: cNRI, continuous net reclassification improvement; EuroSCORE II, European System for Cardiac Operative Risk Evaluation II; IDI, integrated discrimination improvement; STS score, Society of Thoracic Surgeons Predicted Risk of Mortality Score.

Table S9A. Changes in Calibration of the Cox proportional hazards models for predicting all-cause mortality with inclusion of the MELD-XI and CONUT scores

|            | <b>EuroSCORE II*</b> | <b>EuroSCORE II + MELD-XI</b> | <b>EuroSCORE II + CONUT</b> | <b>EuroSCORE II + MELD-XI + CONUT</b> | <b>STS Score†</b> | <b>STS Score + MELD-XI</b> | <b>STS Score + CONUT</b> | <b>STS Score + MELD-XI + CONUT</b> |
|------------|----------------------|-------------------------------|-----------------------------|---------------------------------------|-------------------|----------------------------|--------------------------|------------------------------------|
| Likelihood | -463                 | -445                          | -449                        | -437                                  | -391              | -382                       | -379                     | -370                               |
| Ratio Test |                      |                               |                             |                                       |                   |                            |                          |                                    |
| P value‡   | –                    | <0.001                        | <0.001                      | <0.001                                | –                 | <0.001                     | <0.001                   | <0.001                             |
| AIC        | 943                  | 911                           | 918                         | 896                                   | 794               | 777                        | 771                      | 755                                |
| BIC        | 965                  | 935                           | 942                         | 922                                   | 807               | 793                        | 786                      | 773                                |

\*Fully adjusted model comprising baseline comorbidities (hypertension, dyslipidemia, prior stroke), type of valvular lesion (significant mitral regurgitation, significant tricuspid regurgitation), baseline warfarin therapy, type of valvular procedure (aortic valve replacement and mitral valve procedure), and EuroSCORE II as in Table 2.

†Fully adjusted model comprising baseline comorbidities (dyslipidemia, prior stroke), type of valvular lesion (significant mitral regurgitation, significant tricuspid regurgitation), baseline warfarin therapy, type of valvular procedure (aortic valve replacement and mitral valve procedure), and STS Score as in Table 2.

‡Compared to EuroSCORE II / STS Score model.

Abbreviations: AIC, Akaike information criteria; BIC, Bayesian information criteria; CONUT, Controlling Nutritional Status score; EuroSCORE II, European System for Cardiac Operative Risk Evaluation II; MELD-XI, Model for End-Stage Liver Disease excluding international normalized ratio; STS score, Society of Thoracic Surgeons Predicted Risk of Mortality Score.

Table S9B. Changes in Calibration of the Cox proportional hazards models for predicting adverse events with inclusion of the MELD-XI and CONUT scores

|            | <b>EuroSCORE II*</b> | <b>EuroSCORE II + MELD-XI</b> | <b>EuroSCORE II + CONUT</b> | <b>EuroSCORE II + MELD-XI + CONUT</b> | <b>STS Score†</b> | <b>STS Score + MELD-XI</b> | <b>STS Score + CONUT</b> | <b>STS Score + MELD-XI + CONUT</b> |
|------------|----------------------|-------------------------------|-----------------------------|---------------------------------------|-------------------|----------------------------|--------------------------|------------------------------------|
| Likelihood | -905                 | -897                          | -893                        | -889                                  | -789              | -786                       | -779                     | -778                               |
| Ratio Test |                      |                               |                             |                                       |                   |                            |                          |                                    |
| P value‡   | –                    | <0.001                        | <0.001                      | <0.001                                | –                 | 0.028                      | <0.001                   | <0.001                             |
| AIC        | 1836                 | 1821                          | 1815                        | 1807                                  | 1596              | 1593                       | 1596                     | 1579                               |
| BIC        | 1875                 | 1864                          | 1857                        | 1853                                  | 1622              | 1622                       | 1621                     | 1610                               |

\*Fully adjusted model comprising baseline comorbidities (hypertension, dyslipidemia, prior stroke, atrial fibrillation, heart failure), type of valvular lesion (significant mitral regurgitation, significant tricuspid regurgitation), chronic rheumatic heart disease, baseline medical therapy (angiotensin-converting enzyme inhibitors, warfarin), tricuspid annuloplasty and EuroSCORE II as in Table S2D.

†Fully adjusted model comprising baseline comorbidities (dyslipidemia, prior stroke, atrial fibrillation), chronic rheumatic heart disease, baseline medical therapy (angiotensin-converting enzyme inhibitors, warfarin), tricuspid annuloplasty and STS Score as in Table S2D.

‡Compared to EuroSCORE II / STS Score model.

Abbreviations: AIC, Akaike information criteria; BIC, Bayesian information criteria; CONUT, Controlling Nutritional Status score; EuroSCORE II, European System for Cardiac Operative Risk Evaluation II; MELD-XI, Model for End-Stage Liver Disease excluding international normalized ratio; STS score, Society of Thoracic Surgeons Predicted Risk of Mortality Score.

Table S10. Baseline characteristics of the secondary cohort compared with the rest of the study population

| Characteristics                                               | Patients included in the secondary cohort (n=707) | Patients not included in the secondary cohort (n=202) | P value |
|---------------------------------------------------------------|---------------------------------------------------|-------------------------------------------------------|---------|
| <b>Demographic and anthropometric characteristics</b>         |                                                   |                                                       |         |
| Age, years                                                    | 63 (57-69)                                        | 62 (55-69)                                            | 0.221   |
| Male                                                          | 339 (47.9)                                        | 92 (45.5)                                             | 0.576   |
| Height, cm                                                    | 160 (153-166)                                     | 158 (153-166)                                         | 0.257   |
| Weight, kg                                                    | 59 (51-67)                                        | 56 (50-66)                                            | 0.052   |
| Body mass index, kg/m <sup>2</sup>                            | 23.4 (20.6-25.9)                                  | 22.1 (20.3-24.8)                                      | 0.010   |
| NYHA Class III/IV                                             | 51 (7.2)                                          | 18 (8.9)                                              | 0.451   |
| <b>Cardiovascular risk factors and cardiovascular disease</b> |                                                   |                                                       |         |
| Hypertension                                                  | 236 (33.4)                                        | 54 (26.7)                                             | 0.087   |
| Diabetes Mellitus                                             | 136 (19.2)                                        | 29 (14.4)                                             | 0.121   |
| Dyslipidemia                                                  | 190 (26.9)                                        | 41 (20.3)                                             | 0.067   |
| Smoking                                                       | 138 (19.5)                                        | 40 (19.8)                                             | 1.000   |
| Prior myocardial infarction                                   | 29 (4.1)                                          | 8 (4.0)                                               | 1.000   |
| Prior stroke                                                  | 62 (8.8)                                          | 20 (10.0)                                             | 0.676   |
| Heart failure                                                 | 321 (45.4)                                        | 72 (35.6)                                             | 0.016   |
| Atrial fibrillation                                           | 377 (53.3)                                        | 110 (54.4)                                            | 0.811   |
| <b>Comorbidities</b>                                          |                                                   |                                                       |         |

|                                                               |                  |                  |       |
|---------------------------------------------------------------|------------------|------------------|-------|
| Chronic obstructive pulmonary disease                         | 38 (5.4)         | 14 (6.9)         | 0.492 |
| Cancer                                                        | 34 (4.8)         | 18 (8.9)         | 0.038 |
| <b>Laboratory examination</b>                                 |                  |                  |       |
| Hemoglobin, g/dL                                              | 12.9 (11.8-14.1) | 12.5 (11.0-13.7) | 0.005 |
| White cell count, x 10 <sup>9</sup> /L                        | 5.9 (4.8-7.1)    | 5.9 (4.9-6.7)    | 0.551 |
| Platelet count, x 10 <sup>9</sup> /L                          | 189 (159-226)    | 188 (152-234)    | 0.942 |
| Creatinine, mg/dL                                             | 0.93 (0.78-1.12) | 0.89 (0.77-1.21) | 0.833 |
| eGFR, ml/min/1.73m <sup>2</sup>                               | 75.5 (61.5-89.5) | 78.3 (57.2-93.7) | 0.687 |
| AST, U/L                                                      | 27 (23-34)       | 28 (22-37)       | 0.655 |
| ALT, U/L                                                      | 21 (16-29)       | 20 (16-28)       | 0.436 |
| ALP, U/L                                                      | 71 (58-89)       | 73 (59-100)      | 0.039 |
| Total bilirubin, mg/dL                                        | 0.75 (0.53-1.10) | 0.73 (0.53-1.23) | 0.345 |
| Total cholesterol, mg/dL                                      | 160 (134-189)    | 154 (132-185)    | 0.341 |
| Albumin, g/dL                                                 | 4.2 (4-4.4)      | 4.2 (3.9-4.4)    | 0.463 |
| <b>Valvular heart disease and echocardiographic variables</b> |                  |                  |       |
| MS ≥ moderate                                                 | 176 (29.6)       | 53 (29.3)        | 1.000 |
| MR ≥ moderate                                                 | 325 (46.6)       | 86 (43.0)        | 0.377 |
| AS ≥ moderate                                                 | 255 (40.3)       | 67 (35.4)        | 0.236 |
| AR ≥ moderate                                                 | 184 (27.2)       | 47 (23.6)        | 0.317 |
| TR ≥ moderate                                                 | 272 (38.5)       | 93 (46.0)        | 0.061 |

|                                                   |                  |                  |       |
|---------------------------------------------------|------------------|------------------|-------|
| Chronic Rheumatic Heart Disease                   | 197 (27.9)       | 62 (30.7)        | 0.486 |
| LV Mass, g                                        | 225 (176-294)    | 218 (176-293)    | 0.444 |
| LVEF, %                                           | 60 (55-60)       | 60 (51-60)       | 0.949 |
| Preserved, $\geq$ 50%                             | 591 (84.1)       | 172 (85.1)       | 0.743 |
| Mid-range, 40% - 49%                              | 45 (6.4)         | 12 (5.9)         | 0.871 |
| Reduced, <40%                                     | 43 (6.1)         | 12 (5.9)         | 1.000 |
| PASP, mmHg                                        | 40 (35-50)       | 45 (35-51)       | 0.125 |
| <b>Medications</b>                                |                  |                  |       |
| ACEI                                              | 227 (32.1)       | 59 (29.2)        | 0.441 |
| ARB                                               | 110 (15.6)       | 32 (15.8)        | 1.000 |
| Aldactone                                         | 80 (11.3)        | 37 (18.3)        | 0.012 |
| Beta blockers                                     | 290 (41.0)       | 84 (41.6)        | 0.935 |
| Calcium channel blockers                          | 146 (20.7)       | 39 (19.3)        | 0.694 |
| Digoxin                                           | 209 (29.6)       | 60 (29.7)        | 1.000 |
| Statin                                            | 304 (43.0)       | 69 (34.2)        | 0.028 |
| Warfarin                                          | 322 (45.5)       | 95 (47.0)        | 0.749 |
| <b>Cardiac surgery risk-stratification models</b> |                  |                  |       |
| EuroScore II                                      | 2.43 (1.38-4.39) | 2.41 (1.20-4.80) | 0.955 |
| STS Score                                         | 1.49 (0.88-2.60) | 1.58 (0.77-3.48) | 0.584 |
| <b>Valvular surgery details</b>                   |                  |                  |       |

|                          |            |            |       |
|--------------------------|------------|------------|-------|
| Aortic valve replacement | 363 (51.4) | 97 (48.0)  | 0.425 |
| Mitral valve procedure   | 434 (61.5) | 120 (59.4) | 0.624 |
| Mitral valve replacement | 227 (32.1) | 68 (33.7)  | 0.733 |
| Mitral valve repair      | 207 (29.4) | 52 (25.7)  | 0.332 |
| Tricuspid annuloplasty   | 242 (34.3) | 77 (38.1)  | 0.358 |
| Concomitant CABG         | 92 (13.0)  | 15 (7.5)   | 0.035 |

Values are expressed as median (interquartile range) or number (percentage). P value by Mann-Whitney U test for non-normally distributed continuous variables; P value by  $\chi^2$  test for categorical variables.

Abbreviations: ACEI, angiotensin-converting enzyme inhibitors; ARB, angiotensin II receptor blockers; ALP, alkaline phosphatase; ALT, alanine aminotransaminase; AR, aortic regurgitation; AS, aortic stenosis; AST, aspartate aminotransferase; CABG, coronary artery bypass grafting; eGFR, estimated glomerular filtration rate; EuroSCORE II, European System for Cardiac Operative Risk Evaluation II; LVEF; left ventricular ejection fraction; PASP, pulmonary artery systolic pressure; MR, mitral regurgitation; MS, mitral stenosis; NYHA, New York Heart Association; STS score, Society of Thoracic Surgeons Predicted Risk of Mortality Score; TR, tricuspid regurgitation.



Table S11A. Univariate and multivariate linear regression models showing predictors of 1-year change in MELD-XI score ( $\Delta$ MELD-XI) in patients undergoing valvular surgery

|                                                               | Univariate analysis |         | Multivariate analysis |         |
|---------------------------------------------------------------|---------------------|---------|-----------------------|---------|
|                                                               | OR (95% CI)         | P value | OR (95% CI)           | P value |
| <b>Demographic and anthropometric characteristics</b>         |                     |         |                       |         |
| Age, years                                                    | 1.01 (0.99-1.03)    | 0.188   |                       |         |
| Male                                                          | 0.76 (0.56-1.03)    | 0.079   |                       |         |
| Body mass index, kg/m <sup>2</sup>                            | 1.03 (0.99-1.07)    | 0.199   |                       |         |
| NYHA functional class III/IV                                  | 0.39 (0.22-0.69)    | 0.001   | 0.54 (0.30-0.99)      | 0.045   |
| <b>Cardiovascular risk factors and cardiovascular disease</b> |                     |         |                       |         |
| Hypertension                                                  | 1.58 (1.14-2.20)    | 0.006   | 1.23 (0.86-1.74)      | 0.253   |
| Diabetes Mellitus                                             | 1.81 (1.21-2.70)    | 0.004   | 1.37 (0.90-2.07)      | 0.137   |
| Smoking                                                       | 0.80 (0.54-1.17)    | 0.249   |                       |         |
| Dyslipidemia                                                  | 1.29 (0.90-1.84)    | 0.163   |                       |         |
| Prior myocardial infarction                                   | 2.13 (0.97-4.68)    | 0.060   |                       |         |
| Prior stroke                                                  | 0.70 (0.41-1.20)    | 0.195   |                       |         |
| Atrial fibrillation                                           | 0.61 (0.45-0.83)    | 0.002   | 0.74 (0.51-1.07)      | 0.111   |
| Heart failure                                                 | 0.67 (0.49-0.91)    | 0.010   | 0.78 (0.56-1.10)      | 0.157   |
| <b>Valvular heart disease and echocardiographic variables</b> |                     |         |                       |         |

|                            |                     |        |                  |        |
|----------------------------|---------------------|--------|------------------|--------|
| MS $\geq$ moderate         | 0.98 (0.69-1.41)    | 0.932  |                  |        |
| MR $\geq$ moderate         | 0.58 (0.43-0.79)    | <0.001 | 0.76 (0.52-1.09) | 0.134  |
| AS $\geq$ moderate         | 1.62 (1.17-2.23)    | 0.004  | 1.24 (0.85-1.81) | 0.258  |
| AR $\geq$ moderate         | 1.34 (0.93-1.91)    | 0.112  |                  |        |
| TR $\geq$ moderate         | 0.56 (0.41-0.77)    | <0.001 | 0.97 (0.66-1.42) | 0.871  |
| LV Mass, g                 | 1.000 (0.998-1.002) | 0.928  |                  |        |
| LVEF, %                    | 1.01 (1.00-1.03)    | 0.125  |                  |        |
| PASP, mmHg                 | 0.99 (0.98-1.00)    | 0.120  |                  |        |
| EuroSCORE II               | 1.01 (0.98-1.05)    | 0.479  |                  |        |
| STS Score                  | 0.99 (0.91-1.07)    | 0.790  |                  |        |
| <b>Nutritional status</b>  |                     |        |                  |        |
| Baseline CONUT, continuous | 0.85 (0.77-0.95)    | 0.002  |                  |        |
| $\Delta$ CONUT             | 0.89 (0.78-1.01)    | <0.001 | 1.22 (1.00-1.37) | <0.001 |

Abbreviations: ACEI, angiotensin-converting enzyme inhibitors; ARB, angiotensin II receptor blockers; ALP, alkaline phosphatase; ALT, alanine aminotransaminase; AR, aortic regurgitation; AS, aortic stenosis; AST, aspartate aminotransferase; CABG, coronary artery bypass grafting; CONUT, Controlling Nutritional Status score;  $\Delta$ CONUT, 1-year change in CONUT score; eGFR, estimated glomerular filtration rate; EuroSCORE II, European System for Cardiac Operative Risk Evaluation II; LVEF; left ventricular ejection fraction; PASP, pulmonary artery systolic pressure; MR, mitral regurgitation; MS, mitral stenosis; NYHA, New York Heart Association; STS score, Society of Thoracic Surgeons Predicted Risk of Mortality Score; TR, tricuspid regurgitation.

Table S11B. Univariate and multivariate linear regression models showing predictors of 1-year change in CONUT score ( $\Delta$ CONUT) in patients undergoing valvular surgery

|                                                               | Univariate analysis |         | Multivariate analysis |         |
|---------------------------------------------------------------|---------------------|---------|-----------------------|---------|
|                                                               | OR (95% CI)         | P value | OR (95% CI)           | P value |
| <b>Demographic and anthropometric characteristics</b>         |                     |         |                       |         |
| Age, years                                                    | 0.99 (0.98-1.00)    | 0.182   |                       |         |
| Male                                                          | 1.12 (0.91-1.38)    | 0.270   |                       |         |
| Body mass index, kg/m <sup>2</sup>                            | 1.02 (0.99-1.05)    | 0.138   |                       |         |
| NYHA functional class III/IV                                  | 0.80 (0.54-1.19)    | 0.263   |                       |         |
| <b>Cardiovascular risk factors and cardiovascular disease</b> |                     |         |                       |         |
| Hypertension                                                  | 1.00 (0.80-1.24)    | 0.974   |                       |         |
| Diabetes Mellitus                                             | 1.09 (0.84-1.41)    | 0.515   |                       |         |
| Smoking                                                       | 1.23 (0.95-1.59)    | 0.114   |                       |         |
| Dyslipidemia                                                  | 0.92 (0.73-1.16)    | 0.491   |                       |         |
| Prior myocardial infarction                                   | 1.50 (0.90-2.51)    | 0.124   |                       |         |
| Prior stroke                                                  | 0.83 (0.58-1.20)    | 0.319   |                       |         |
| Atrial fibrillation                                           | 0.91 (0.74-1.11)    | 0.343   |                       |         |
| Heart failure                                                 | 0.91 (0.74-1.11)    | 0.344   |                       |         |
| <b>Valvular heart disease and echocardiographic variables</b> |                     |         |                       |         |

|                              |                     |        |                   |        |
|------------------------------|---------------------|--------|-------------------|--------|
| MS $\geq$ moderate           | 1.06 (0.83-1.35)    | 0.627  |                   |        |
| MR $\geq$ moderate           | 1.12 (0.91-1.38)    | 0.269  |                   |        |
| AS $\geq$ moderate           | 1.04 (0.84-1.30)    | 0.709  |                   |        |
| AR $\geq$ moderate           | 0.79 (0.62-1.00)    | 0.049  | 0.74 (0.57-0.95)  | 0.019  |
| TR $\geq$ moderate           | 0.73 (0.60-0.91)    | 0.004  | 0.85 (0.67-1.083) | 0.188  |
| LV Mass, g                   | 1.000 (0.998-1.001) | 0.480  |                   |        |
| LVEF, %                      | 1.01 (1.00-1.02)    | 0.020  |                   |        |
| PASP, mmHg                   | 0.99 (0.98-1.00)    | 0.008  | 0.99 (0.99-1.00)  | 0.103  |
| EuroSCORE II                 | 0.97 (0.95-0.99)    | 0.009  | 0.98 (0.95-1.00)  | 0.041  |
| STS Score                    | 0.97 (0.92-1.03)    | 0.292  |                   |        |
| <b>Hepatorenal function</b>  |                     |        |                   |        |
| Baseline MELD-XI, continuous | 0.99 (0.96-1.03)    | 0.626  |                   |        |
| $\Delta$ MELD-XI             | 1.12 (1.07-1.17)    | <0.001 | 1.16 (1.11-1.21)  | <0.001 |

Abbreviations: AR, aortic regurgitation; AS, aortic stenosis; CI, confidence interval; CONUT, Controlling Nutritional Status score; EuroSCORE II, European System for Cardiac Operative Risk Evaluation II; LV, left ventricle; LVEF, left ventricular ejection fraction; PASP, pulmonary artery systolic pressure; MELD-XI, Model for End-Stage Liver Disease excluding international normalized ratio;  $\Delta$ MELD-XI, 1-year change in MELD-XI score; MR, mitral regurgitation; MS, mitral stenosis; NYHA, New York Heart Association; OR, odds ratio; STS score, Society of Thoracic Surgeons Predicted Risk of Mortality Score; TR, tricuspid regurgitation.

Table S11C. Univariate and multivariate logistic regression models showing predictors of postoperative hepatorenal dysfunction (MELD-XI) and malnutrition (CONUT) in patients undergoing valvular surgery

|                                                               | Univariate analysis |         | Multivariate analysis<br>(EuroSCORE II model) |         | Multivariate analysis<br>(STS Score model) |         |
|---------------------------------------------------------------|---------------------|---------|-----------------------------------------------|---------|--------------------------------------------|---------|
|                                                               | OR (95% CI)         | P value | OR (95% CI)                                   | P value | OR (95% CI)                                | P value |
| <b>Demographic and anthropometric characteristics</b>         |                     |         |                                               |         |                                            |         |
| Age, years                                                    | 1.06 (1.03-1.08)    | <0.001  |                                               |         |                                            |         |
| Male                                                          | 2.06 (1.36-3.16)    | <0.001  |                                               |         |                                            |         |
| Body mass index, kg/m <sup>2</sup>                            | 1.03 (0.97-1.09)    | 0.300   |                                               |         |                                            |         |
| NYHA functional class<br>III/IV                               | 1.79 (0.87-3.46)    | 0.093   |                                               |         |                                            |         |
| <b>Cardiovascular risk factors and cardiovascular disease</b> |                     |         |                                               |         |                                            |         |
| Hypertension                                                  | 1.75 (1.15-2.65)    | 0.009   | 1.87 (1.00-3.51)                              | 0.050   |                                            |         |
| Diabetes Mellitus                                             | 3.42 (2.18-5.33)    | <0.001  |                                               |         |                                            |         |
| Smoking                                                       | 1.30 (0.78-2.09)    | 0.302   |                                               |         |                                            |         |
| Dyslipidemia                                                  | 1.45 (0.92-2.23)    | 0.101   |                                               |         |                                            |         |
| Prior myocardial<br>infarction                                | 2.63 (1.11-5.79)    | 0.020   | 0.45 (0.07-2.36)                              | 0.372   | 0.70 (0.11-3.38)                           | 0.673   |
| Prior stroke                                                  | 1.38 (0.68-2.60)    | 0.347   |                                               |         |                                            |         |
| Atrial fibrillation                                           | 1.16 (0.77-1.76)    | 0.475   |                                               |         |                                            |         |
| Heart failure                                                 | 1.94 (1.28-2.95)    | 0.002   | 1.12 (0.60-2.10)                              | 0.721   |                                            |         |

| <b>Valvular Heart Disease and Echocardiographic variables</b> |                     |        |                     |        |                     |        |
|---------------------------------------------------------------|---------------------|--------|---------------------|--------|---------------------|--------|
| MS ≥ moderate                                                 | 0.82 (0.48-1.37)    | 0.463  |                     |        |                     |        |
| MR ≥ moderate                                                 | 1.18 (0.78-1.78)    | 0.441  |                     |        |                     |        |
| AS ≥ moderate                                                 | 1.05 (0.67-1.62)    | 0.835  |                     |        |                     |        |
| AR ≥ moderate                                                 | 0.86 (0.52-1.37)    | 0.539  |                     |        |                     |        |
| TR ≥ moderate                                                 | 1.95 (1.29-2.95)    | 0.002  | 1.28 (0.65-2.53)    | 0.481  |                     |        |
| LV Mass, g                                                    | 1.004 (1.002-1.006) | <0.001 | 1.004 (1.000-1.007) | 0.025  | 1.004 (1.001-1.008) | 0.006  |
| LVEF, %                                                       | 0.97 (0.96-0.99)    | 0.009  |                     |        |                     |        |
| PASP, mmHg                                                    | 1.02 (1.01-1.04)    | 0.005  | 1.00 (0.98-1.02)    | 0.663  | 1.00 (0.98-1.02)    | 0.984  |
| <b>Cardiac surgery risk-stratification models</b>             |                     |        |                     |        |                     |        |
| EuroSCORE II                                                  | 1.13 (1.08-1.19)    | <0.001 | 1.14 (1.07-1.23)    | <0.001 |                     |        |
| STS Score                                                     | 1.31 (1.19-1.43)    | <0.001 |                     |        | 1.12 (0.98-1.29)    | 0.09   |
| <b>Baseline Hepatorenal function</b>                          |                     |        |                     |        |                     |        |
| MELD-XI, continuous                                           | 1.54 (1.42-1.69)    | <0.001 | 1.47 (1.31-1.65)    | <0.001 | 1.43 (1.28-1.61)    | <0.001 |
| <b>Baseline Nutritional status</b>                            |                     |        |                     |        |                     |        |
| CONUT, continuous                                             | 1.75 (1.53-2.03)    | <0.001 | 1.28 (1.05-1.56)    | 0.014  | 1.37 (1.12-1.68)    | 0.002  |

Abbreviations: AR, aortic regurgitation; AS, aortic stenosis; CI, confidence interval; CONUT, Controlling Nutritional Status score; EuroSCORE II, European System for Cardiac Operative Risk Evaluation II; LV, left ventricle; LVEF, left ventricular ejection fraction; PASP, pulmonary artery systolic pressure; MELD-XI, Model for End-Stage Liver Disease excluding international normalized ratio; MR, mitral regurgitation; MS, mitral stenosis; NYHA, New York Heart Association; OR, odds ratio; STS score, Society of Thoracic Surgeons Predicted Risk of Mortality Score; TR, tricuspid regurgitation.

Figure S1. Study population flowchart for inclusion of patients undergoing valvular surgery

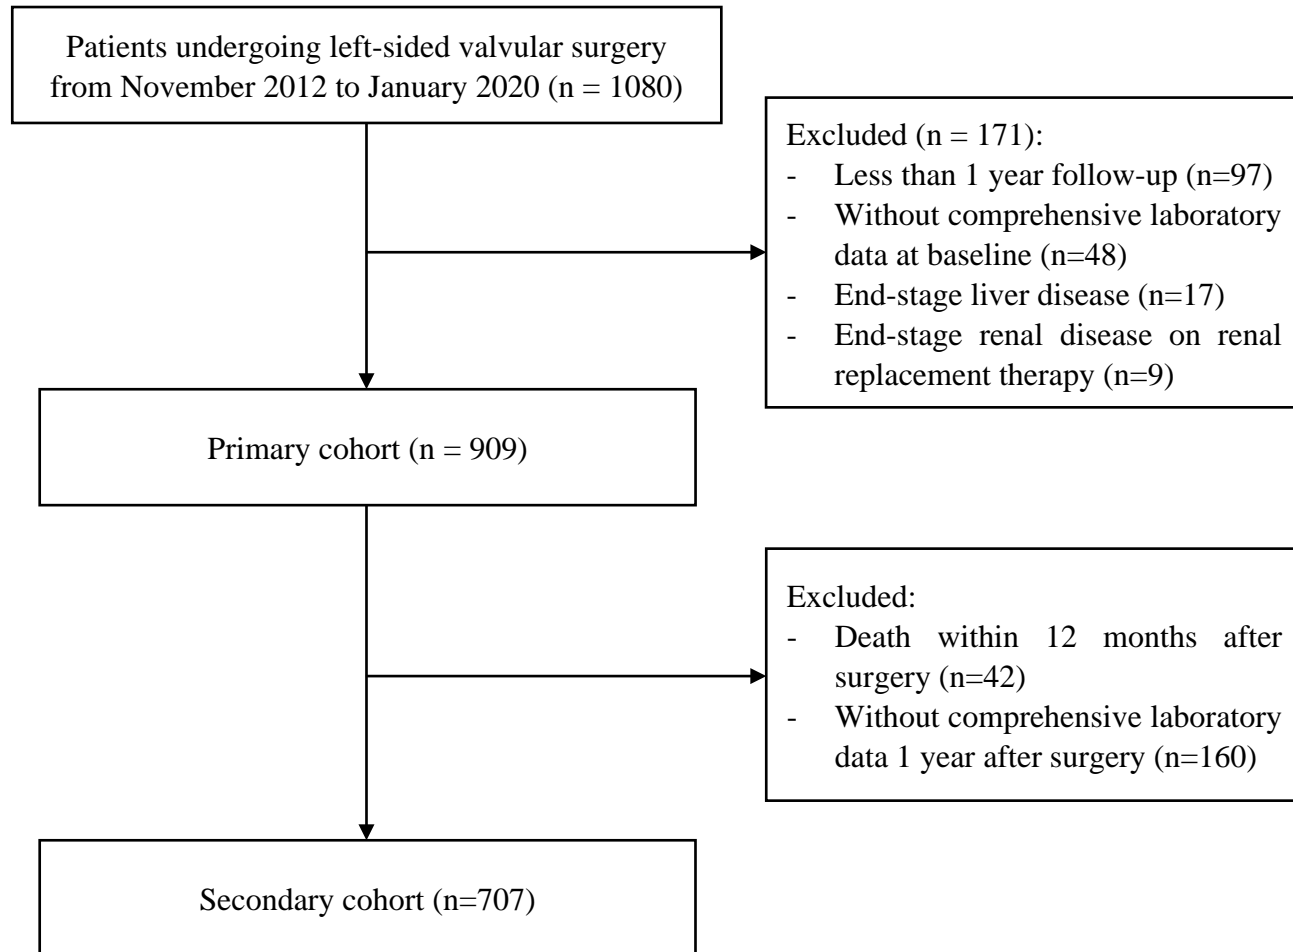

Figure S2. Prevalence and association of hepatorenal dysfunction (MELD-XI) and malnutrition (CONUT) with incidence of all-cause mortality and adverse events

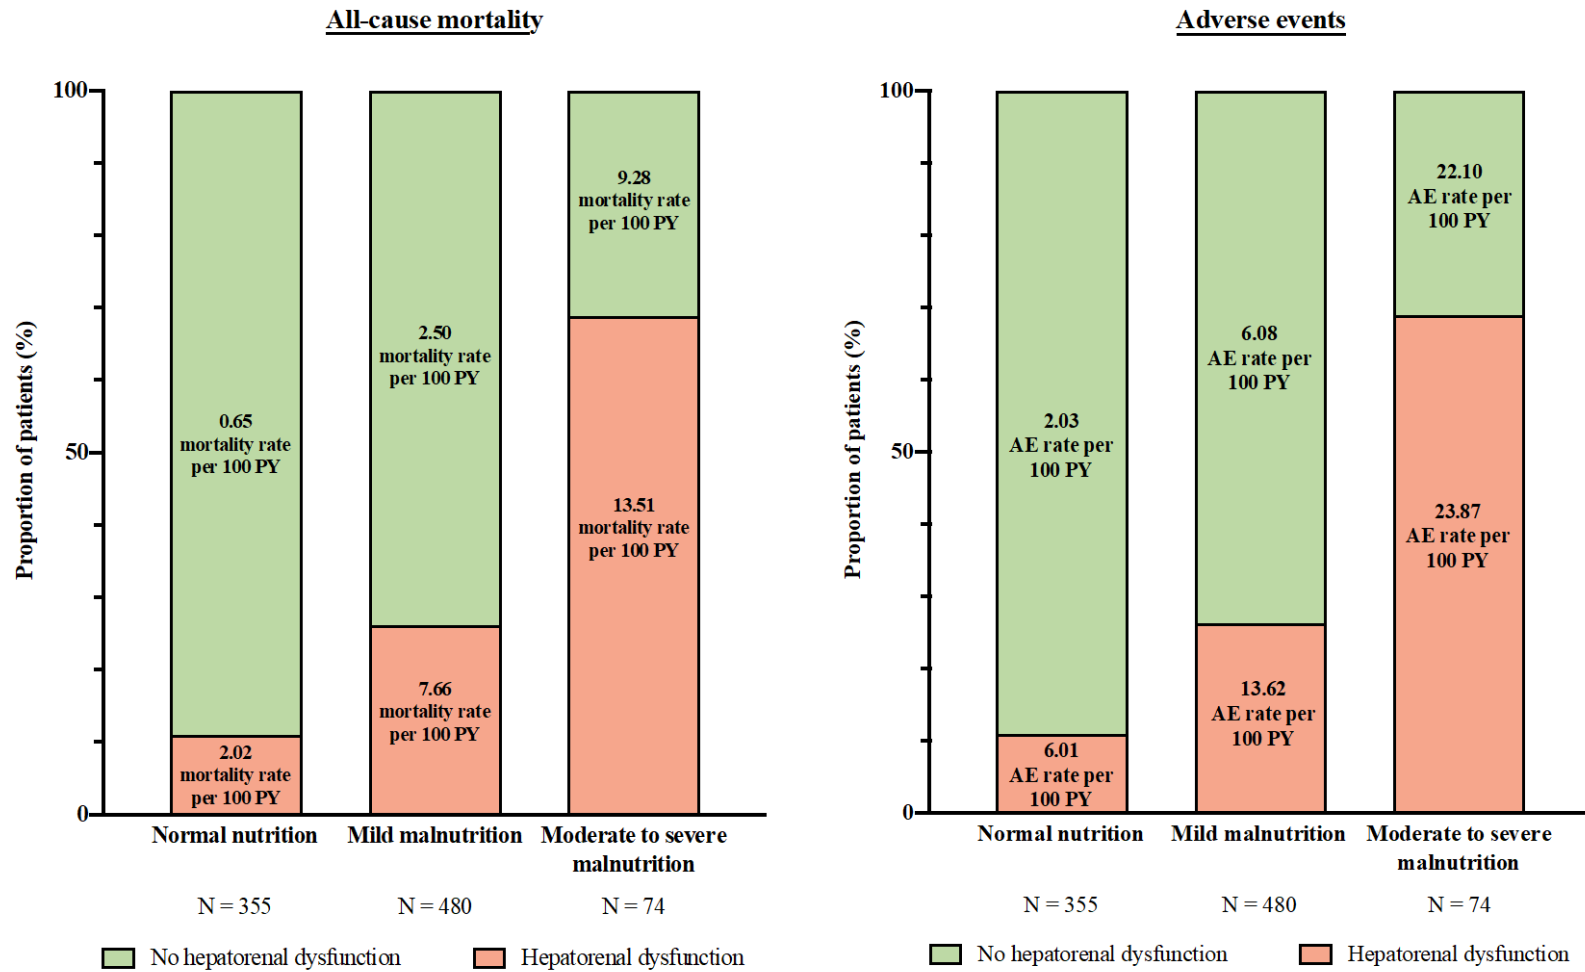

Abbreviations: AE, adverse event; PY, person-years.



Figure S3. Kaplan-Meier curves for all-cause mortality and adverse events by baseline hepatorenal dysfunction (MELD-XI) and malnutrition (CONUT)

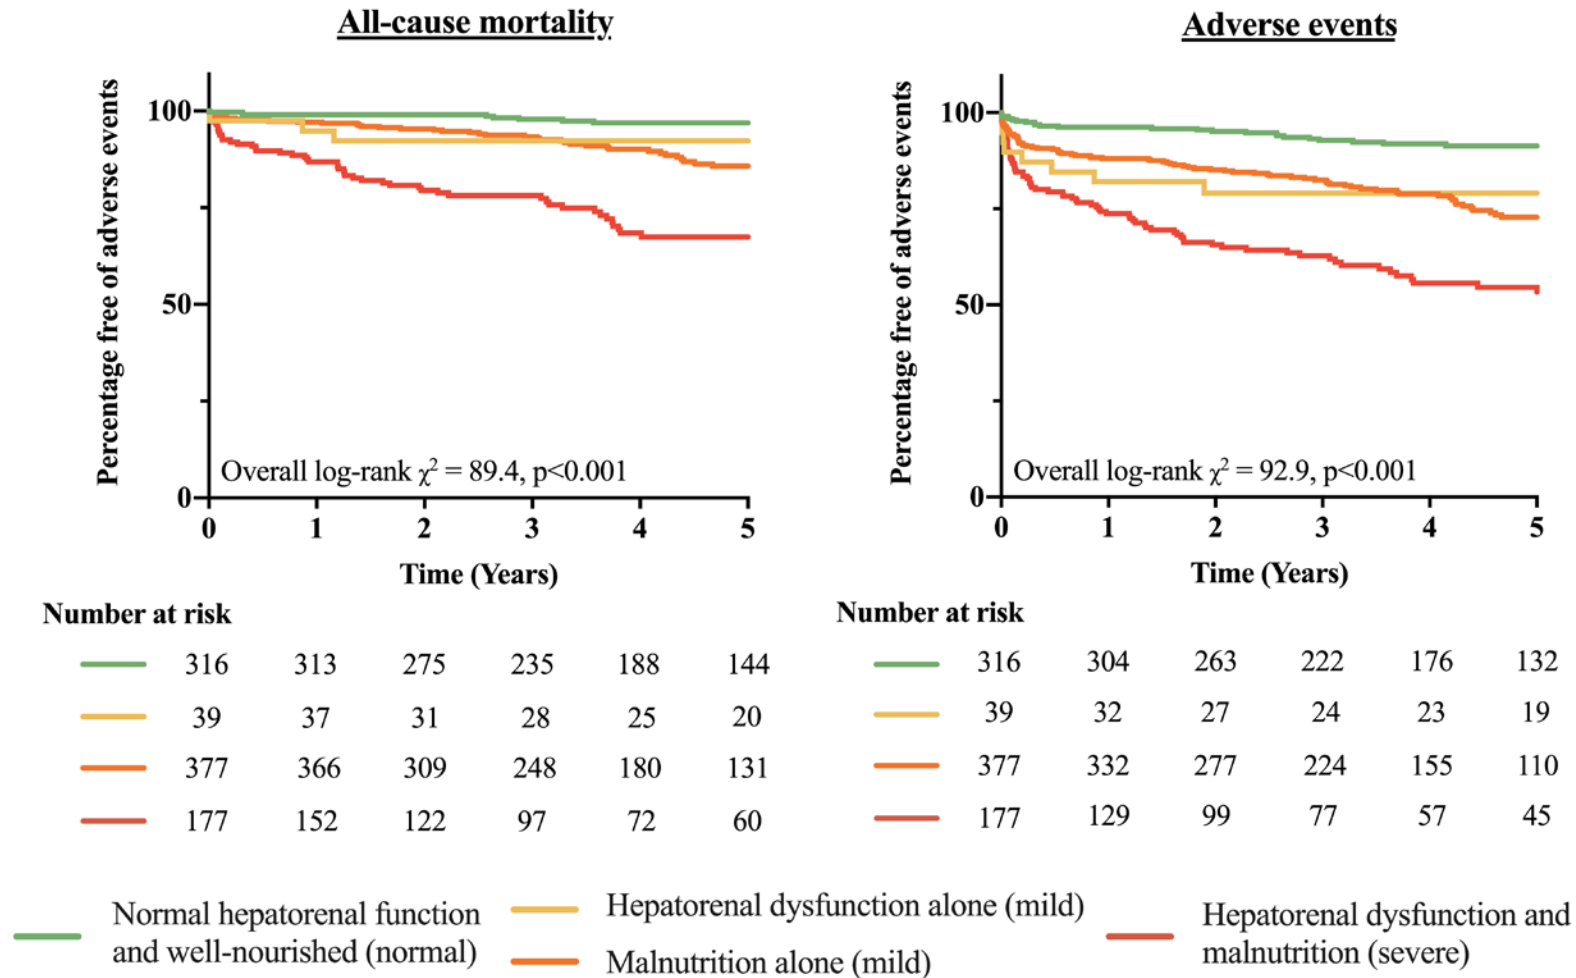

Figure S4. Strength of association of clinical and echocardiographic covariates and risk scores with mortality and adverse outcomes according to the explained log-likelihood ( $\chi^2$ ) for each predictor in patients undergoing valvular surgery

**A. EuroSCORE II model – All-cause mortality**

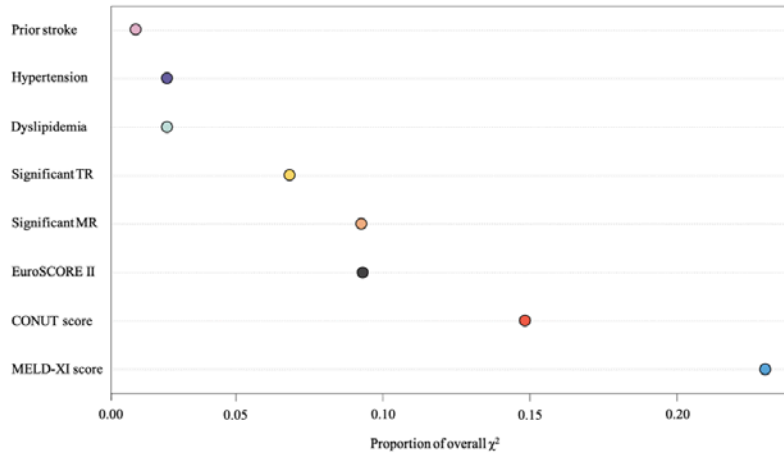

**B. EuroSCORE II model – Adverse outcomes**

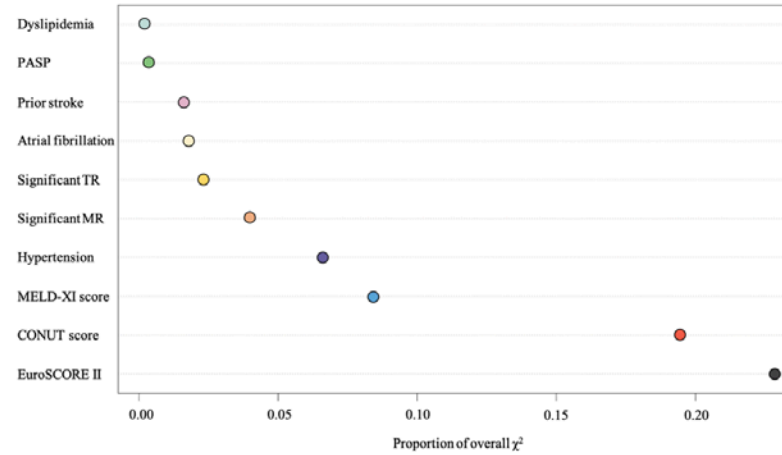

**C. STS score model – All-cause mortality**

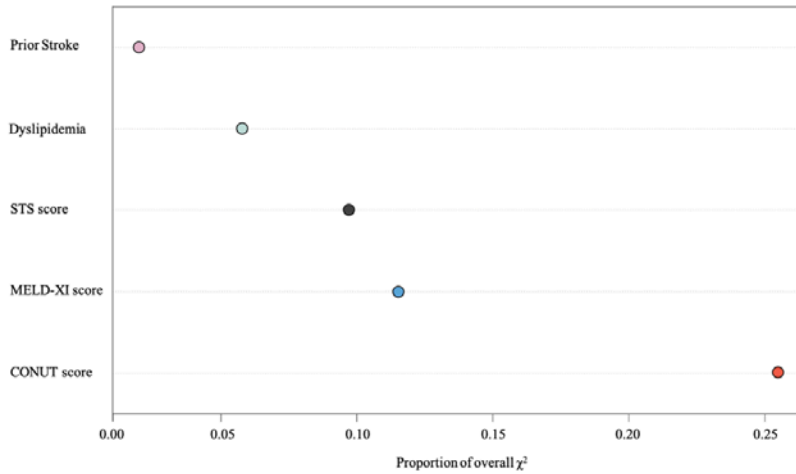

**D. STS score model – Adverse outcomes**

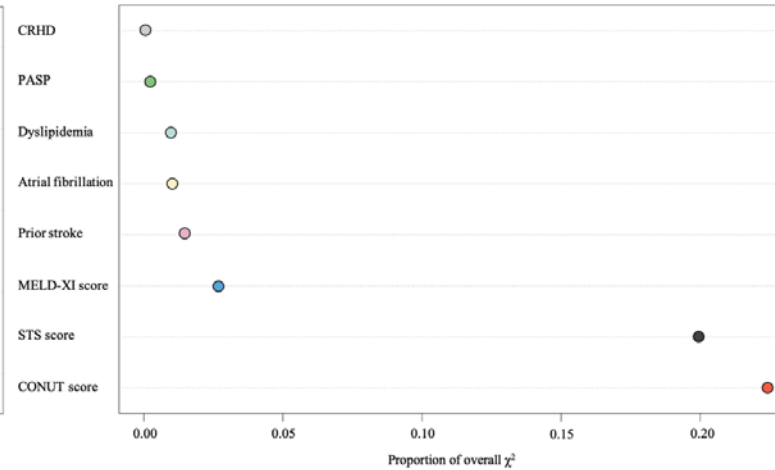

E. Clinical model – All-cause mortality

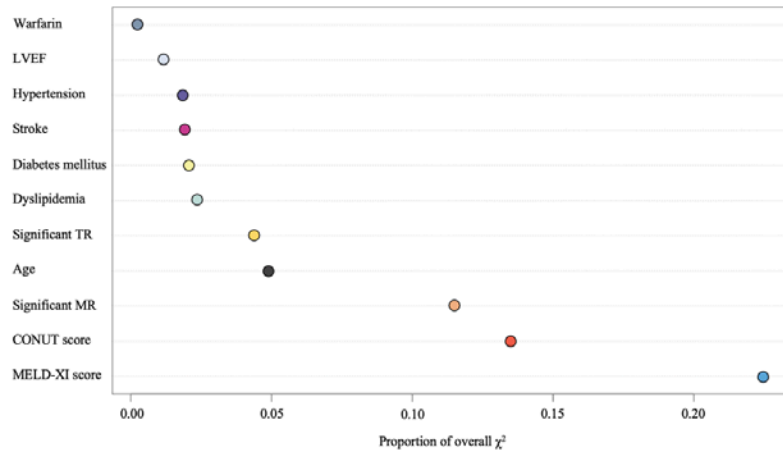

F. Clinical model – Adverse outcomes

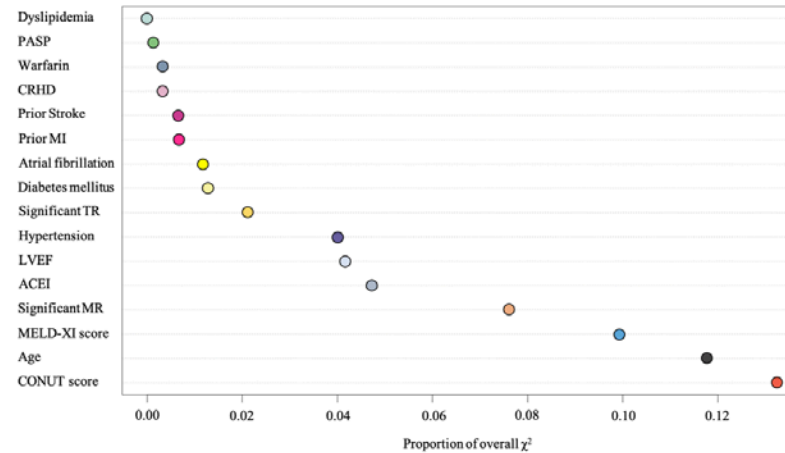

Abbreviations: ACEI, angiotensin-converting enzyme inhibitors; CONUT, Controlling Nutritional Status score; CRHD, chronic rheumatic heart disease; EuroSCORE II, European System for Cardiac Operative Risk Evaluation II; LVEF; left ventricular ejection fraction; PASP, pulmonary artery systolic pressure; MELD-XI, Model for End-Stage Liver Disease excluding international normalized ratio; MI, myocardial infarction; MR, mitral regurgitation; NYHA, New York Heart Association; STS score, Society of Thoracic Surgeons Predicted Risk of Mortality Score; TR, tricuspid regurgitation.
